# Asymmetric hybridization during allopolyploid speciation

## 1 Strongly asymmetric hybridization barriers shape the origin of a new 2 polyploid species and its hybrid ancestor<sup>1</sup>

3

4 Mario Vallejo-Marín<sup>2</sup>

5 Arielle M. Cooley<sup>3</sup>

6 Michelle Lee Yue Qi<sup>2</sup>

7 Madison Folmer<sup>5</sup>

8 Michael R. McKain<sup>4</sup>

9 Joshua R. Puzey<sup>5,6</sup>

10

11 <sup>1</sup> Manuscript received \_\_\_\_\_; revision accepted \_\_\_\_\_.

12

13 <sup>2</sup> Biological and Environmental Science, School of Natural Sciences. University of Stirling. FK9

14 4LA. Stirling, Scotland, United Kingdom

15 <sup>3</sup> Biology Department, Whitman College, Walla Walla, Washington 99362

16 <sup>4</sup> Donald Danforth Plant Science Center, St. Louis, MO 63132

17 <sup>5</sup> Department of Biology, College of William and Mary, Williamsburg, Virginia 23185

18 <sup>6</sup> Author for correspondence. Email: [jrpuzey@wm.edu](mailto:jrpuzey@wm.edu)

19

20

21

22

# Asymmetric hybridization during allopolyploid speciation

23

## 24 ABSTRACT

- 25 • *Premise of the study:* Hybridization between diploids and tetraploids can lead to new  
26 allopolyploid species, often via a triploid intermediate. Viable triploids are often produced  
27 asymmetrically, with greater success observed for “maternal-excess” crosses where the  
28 mother has a higher ploidy than the father. Here we investigate the evolutionary origins of  
29 *Mimulus peregrinus*, an allohexaploid recently derived from the triploid *M. x robertsii*, to  
30 determine whether reproductive asymmetry has shaped the formation of this new species.
- 31 • *Methods:* We used reciprocal crosses between the diploid (*M. guttatus*) and tetraploid (*M.*  
32 *luteus*) progenitors to determine the viability of triploid *M. x robertsii* hybrids resulting from  
33 paternal-versus maternal-excess crosses. To investigate whether experimental results predict  
34 patterns seen in the field, we performed parentage analyses comparing natural populations of  
35 *M. peregrinus* to its diploid, tetraploid, and triploid progenitors. Organellar sequences  
36 obtained from pre-existing genomic data, supplemented with additional genotyping was used  
37 to establish the maternal ancestry of multiple *M. peregrinus* and *M. x robertsii* populations.
- 38 • *Key results:* We find strong evidence for asymmetric origins of *M. peregrinus*, but opposite  
39 to the common pattern, with paternal-excess crosses significantly more successful than  
40 maternal-excess crosses. These results successfully predicted hybrid formation in nature: 111  
41 of 114 *M. x robertsii* individuals, and 27 of 27 *M. peregrinus*, had an *M. guttatus* maternal  
42 haplotype.
- 43 • *Conclusion:* This study, which includes the first *Mimulus* chloroplast genome assembly,  
44 demonstrates the utility of parentage analysis through genome skimming. We highlight the  
45 benefits of complementing genomic analyses with experimental approaches to understand  
46 asymmetry in allopolyploid speciation.

47

48 **KEYWORDS:** Allopolyploidy; asexual reproduction, chloroplast genome; genome skimming,  
49 hybridization; introduced species; *Mimulus peregrinus*; mitochondrial genome; sterile hybrid;  
50 triploid block.

## Asymmetric hybridization during allopolyploid speciation

### INTRODUCTION

The extraordinary abundance of polyploid lineages among flowering plants (Otto and Whitton, 2000; Soltis et al., 2014; Barker et al., 2015) has led to great interest in understanding the processes of polyploid formation and establishment in the wild. Polyploids (individuals carrying more than two sets of chromosomes) can originate through a variety of pathways. These include the somatic doubling of chromosomes in meristematic tissue during mitosis and, perhaps more commonly, unreduced gametes (Ramsey and Schemske, 1998; Mallet, 2007). When the formation of polyploids involves fusion of gametes with different ploidy levels (e.g., reduced and unreduced gametes, or between a diploid and a tetraploid), an individual with an unbalanced ploidy level (e.g., a triploid) will be formed (Levin, 2002). In most cases, these odd-ploidy individuals are a transient phase in polyploid formation, leading to the eventual production of higher ploidy, stable lineages such as tetraploids and hexaploids (Levin, 2002).

Odd-ploidy levels represent a significant challenge to overcome in the formation of polyploids, as inter-ploidy crosses often display strong post-zygotic reproductive barriers, severely reducing hybrid viability and fertility (Ramsey and Schemske, 1998; Levin, 2002; Comai, 2005; Köhler, Scheid, and Erilova, 2010). The term “triploid block” has been coined to describe the regular observation that inter-ploidy crosses, specifically between diploids and tetraploids, often result in early hybrid inviability and sterility (Köhler, Scheid, and Erilova, 2010). However, evidence from both natural and experimental systems has shown that interploidy crosses can sometimes produce odd-ploidy offspring that are viable (Burton and Husband, 2000; Husband, 2004; Stace, Preston, and Pearman, 2015).

The ability to overcome the triploid block can be asymmetric, with offspring viability dependent on whether the maternal or paternal parent had the higher ploidy level (Köhler, Scheid, and Erilova, 2010). Asymmetric hybridization has considerable potential for influencing population genetic processes. It generates a predictable bias in cytoplasmic inheritance, and in some cases can promote unidirectional introgression (Field et al., 2011). Repeated backcrossing between an asymmetrically-produced hybrid and its paternal pollen source may lead to “cytoplasmic capture,” in which the mitochondria and chloroplasts of the maternal progenitor are combined with the nuclear genome of the paternal progenitor (Petit et al., 2004). Asymmetric introgression

# Asymmetric hybridization during allopolyploid speciation

82 can have conservation implications, for example through genetic swamping or competitive  
83 displacement of the rarer progenitor species (Rhymer and Simberloff, 1996).  
84  
85 Asymmetric hybridization can be explained by a variety of mechanisms, including cyto-nuclear  
86 incompatibilities (Tiffin, Olson, and Moyle, 2001), or imbalances in either the ploidy ratio of  
87 endosperm:embryo (Watkins, 1932; Burton and Husband, 2000) or between maternal:paternal  
88 genomes (Haig and Westoby, 1989; Köhler, Scheid, and Erilova, 2010). Barriers to inter-ploidy  
89 mating within and between species, including triploid block, have been studied using controlled  
90 crosses in a variety of natural and artificially produced diploids and polyploids (Ramsey and  
91 Schemske, 1998; Husband, 2004; Köhler, Scheid, and Erilova, 2010; Scott, Tratt, and Bolbol,  
92 2013). Earlier surveys of interploidy crossing data determined that maternal-excess crosses—  
93 those in which the maternal parent has a higher ploidy level than the paternal one—are  
94 consistently more successful than paternal-excess crosses at producing viable triploid seeds  
95 (Stebbins, 1957; Ramsey and Schemske, 1998). However, a number of counter-examples, in  
96 which paternal-excess crosses are more successful, have been recently discovered (Table 1;  
97 Appendix S1).  
98  
99 Asymmetric reproductive barriers during interploidy hybridization can be identified  
100 experimentally by performing reciprocal crosses (e.g. Husband, 2004), but discovering whether  
101 asymmetries observed in the lab translate to patterns in nature, requires tracing the maternal  
102 *versus* paternal ancestry of wild populations. Ancestry analysis of this kind requires uniparentally  
103 inherited genetic markers, such as mitochondria or chloroplast that contain enough genetic  
104 differences between parental taxa. The rapid growth of next generation sequencing projects offers  
105 an extraordinary opportunity to generate (sometimes inadvertently) exactly the type of data  
106 necessary to elucidate the maternal ancestry of wild populations at a genomic scale. Because  
107 cytoplasmic genomes (mitochondria and chloroplast) are present at a much higher number per  
108 cell than the nuclear genome, targeted and non-targeted sequencing often results in incidental  
109 high coverage of cytoplasmic genomes, as well as of repetitive elements in the nuclear genome  
110 (Dodsworth, 2015). Thus mitochondrial and chloroplast information can be “skimmed” from the  
111 larger collection of sequences obtained in whole-genome sequencing projects (Straub et al.,  
112 2012), or from targeted sequencing approaches (Weitemier et al., 2014), and used for parentage  
113 analyses. These resource-efficient approaches not only rescue information that would otherwise

## Asymmetric hybridization during allopolyploid speciation

114 be discarded, but also provide effective means for addressing longstanding questions about the  
115 ancestries of naturally-occurring polyploid lineages.

116

117 A new system for investigating allopolyploid speciation, using the complementary approaches of  
118 experimental manipulation and next-generation sequencing, is the complex of naturalized  
119 *Mimulus* L. (Phrymaceae) species in Great Britain and Ireland. Hybridization between introduced  
120 populations of the North American diploid *M. guttatus* ( $2n = 2x = 28$ ) and the South American  
121 tetraploid *M. luteus* ( $2n = 4x = 60-62$ ) have given rise to *M. x robertsii*, a triploid ( $2n = 3x = 44-$   
122 46), sexually sterile, but widely naturalized taxon distributed across the British Isles (Roberts,  
123 1964; Parker, 1975; Silverside, 1990; Vallejo-Marín et al., 2015). By means of rapid vegetative  
124 propagation, *M. x robertsii* has become common and is now found in about 40% of British  
125 *Mimulus* populations (Vallejo-Marín and Lye, 2013). The reproductive asymmetry typical of  
126 interploidy matings has been reported for *M. guttatus* x *M. luteus* hybrids, but in the less common  
127 direction: triploids have been successfully produced only by paternal-excess crosses, with  
128 tetraploid *M. luteus* as the pollen donor (Roberts, 1964; Parker, 1975). These early studies suggest  
129 that *M. x robertsii* is likely to have arisen in the same way, from a *M. guttatus* mother and *M.*  
130 *luteus* father. *Mimulus x robertsii* has given rise at least twice to a sexually fertile allohexaploid  
131 species, *M. peregrinus* Vallejo-Marín ( $2n = 6x = 92$ ), through genome doubling (Vallejo-Marín,  
132 2012; Vallejo-Marín et al., 2015). This speciation event is quite recent, as both progenitors were  
133 introduced to the United Kingdom (UK) in the last 200 years, and the earliest records of hybrid  
134 populations date back approximately 140 years (Preston, Pearman, and Dines, 2002; Vallejo-  
135 Marín et al., 2015). Given that *M. peregrinus* evolved from *M. x robertsii*, one would expect that  
136 the maternal ancestor of *M. peregrinus* is also *M. guttatus*.

137

138 Here we investigate the occurrence and consequences of inter-ploidy reproductive barriers in  
139 polyploid *Mimulus* (*M. x robertsii* and *M. peregrinus*) produced by hybridization between diploid  
140 (*M. guttatus*) and tetraploid taxa (*M. luteus*). We complement classic crossing experiments with  
141 analyses of the parentage of natural hybrid populations using genome-skimming of chloroplast  
142 and mitochondrial genomes and single-marker genotyping. Inter-ploidy hybrids in *Mimulus* are  
143 ideally suited for this purpose due to their experimental tractability (Wu et al., 2008) as well as  
144 the growing genomic resources available for this genus, including whole genome sequences for  
145 both nuclear and mitochondrial genomes for *M. guttatus* (Mower et al., 2012; Hellsten et al.,  
146 2013), ongoing work on the *M. luteus* genome (Edger et al., in prep), and recent whole-genome

## Asymmetric hybridization during allopolyploid speciation

and targeted sequence data for native and introduced *Mimulus* populations (Puzey and Vallejo-Marín, 2014; Vallejo-Marín et al., 2015). We experimentally evaluate the success of reciprocal crosses between *M. guttatus* and *M. luteus* to confirm previous observations of triploid block asymmetry, and compare the phenotype of hybrids produced in reciprocal directions. We use a combination of genome skimming and genotyping of natural populations to evaluate the hypothesis that reproductive asymmetry observed between *M. guttatus* and *M. luteus* violates the trend (Ramsey and Schemske, 1998) of triploid formation via maternal-excess crosses. Our study addresses the following specific questions: (1) What is the effect of cross direction on the phenotype and viability of hybrids? (2) Are naturalized triploid hybrids between *M. guttatus* and *M. luteus* (i.e., *M. x robertsii*) asymmetrically produced, and does the asymmetry match the pattern observed in experimental hybridizations? (3) Who is the maternal parent of hexaploid *M. peregrinus*, and does this fit the pattern seen for experimental crosses and naturalized *M. x robertsii*?

## MATERIAL AND METHODS

**Study system**—The introduction of *Mimulus* into Europe in the 1800's resulted in hybridization between closely related, but previously geographically isolated taxa. Hybridization between taxa in the North American *M. guttatus* DC. and South American *M. luteus* L. species aggregates has yielded a taxonomically complex array of hybrids that establish naturalized populations in the British Isles (Roberts, 1964; Silverside, 1998; Stace, Preston, and Pearman, 2015). The *M. luteus* group includes a number of interfertile taxa: *M. luteus* var. *luteus*, *M. luteus* var. *variegatus*, *M. naiandinus*, *M. cupreus*, and *M. depressus* (Grant, 1924; Watson, 1989; von Bohlen, 1995; Cooley and Willis, 2009), some of which have become naturalized in the British Isles (Stace, 2010). Extant populations of *M. luteus* in the British Isles include highly polymorphic individuals, which may have resulted from hybridization events between different naturalized varieties. Here we focus on interspecific hybrids between *M. guttatus* and different varieties of *M. luteus* s.l., excluding hybrids with another closely related South American taxon, *M. cupreus*, which are rarer and easily distinguished (Stace, 2010). Hybrids between *M. guttatus* and *M. luteus* s.l. receive different taxonomic names, mostly based on color patterns of the corolla (Stace, 2010). For simplicity, hereafter we refer to these hybrids as *M. x robertsii*, and the interested reader is referred to Silverside (1998) for a more detailed morphological classification of hybrid types.

## Asymmetric hybridization during allopolyploid speciation

Hybridization between diploid *M. guttatus* ( $2n = 2x = 28$ ) and tetraploid *M. luteus* ( $2n = 4x = 60-62$ ) yields highly sterile, triploid individuals ( $2n = 3x = 44 - 46$ , *M. x robertsii*). Despite their sterility (Roberts, 1964; Parker, 1975), these triploid hybrids can be vegetatively vigorous and display a strong capacity to reproduce by clonal propagation from plant fragments that root at the nodes. *M. x robertsii* has been very successful at establishing naturalized populations throughout the British Isles (Stace, Preston, and Pearman, 2015), and it can become locally abundant, forming populations of thousands of individuals. A recent genetic survey of *M. x robertsii* showed that populations of this sterile hybrid are genetically variable and composed of multiple highly heterozygous genotypes (Vallejo-Marín and Lye, 2013). Approximately 40-50% of extant *Mimulus* populations in the United Kingdom contain *M. x robertsii* (Vallejo-Marín and Lye, 2013).

**Crossing design**—To generate the plants used in this study, seeds were collected from natural populations of *M. guttatus* from Dunblane, Perthshire, Scotland (56.19°N, 3.98°W), and *M. luteus s.l.* from Coldstream, Scottish Borders, Scotland (55.65°N, 2.24°W) on 8 Aug 2009 and 10 July 2010, respectively. Individuals of *M. luteus s.l.* from Coldstream are polymorphic for the number of purple blotches present in the corolla lobes. Phenotypically, these *M. luteus s.l.* plants resemble intraspecific hybrids between *M. luteus* var. *luteus* and *M. luteus* var. *variegatus* (sometimes called *M. smithii*). From each population, we randomly chose six individuals collected as seeds from separate maternal plants and crossed them to generate 12 outbred lines for each species using an equal contribution design in which each individual contributed to the genome of four lines, two as the paternal parent and two as the maternal parent.

To generate interspecific hybrids, each of the 12 *M. guttatus* outbred lines were randomly paired with one of 12 *M. luteus s.l.* outbred lines. Two of these interspecific pairs were then assigned to each of six mating groups, and each of these groups was subject to a diallel cross, except selfs. To avoid half-sib matings, conspecifics in the same mating group were chosen to be unrelated. Therefore, all matings within each group are outbred and have the same inbreeding coefficient relative to the parental generation. Flowers were emasculated before conducting hand pollinations. Only 33 out of 72 possible hybrid crosses were performed due to flower availability.

The crossing design yielded individuals of four different types: (a) *M. guttatus* x *M. guttatus* (MG x MG); (b) *M. luteus s.l.* x *M. luteus s.l.* (ML x ML); and reciprocal F1 hybrid crosses of (c) *M. guttatus* x *M. luteus s.l.* (MG x ML), and (d) *M. luteus s.l.* x *M. guttatus* (ML x MG). Hereafter,



## Asymmetric hybridization during allopolyploid speciation

crosses are represented as maternal x paternal parent. In total we obtained seeds of 33 lines of the following crossing types: MG x MG (4 lines), ML x ML (10 lines), MG x ML (10 lines), and ML x MG (9 lines). For all subsequent experiments, we randomly chose four lines of each crossing type (16 lines total; Appendix S2; see Supplemental Data with the online version of this article).

**Seed production**—To determine the number of seeds produced per fruit, between 14 to 20 days after hand pollination, 9 to 11 randomly selected fruits of each parental and F1 cross types were collected into glassine paper bags. The fruits were dissected in a stereo microscope (MZ6, Leica Microsystems, Milton Keynes, UK) at 0.63x – 4.0x magnification to remove the fruit casing and count all seeds.

**Germination rate**—To determine seed viability and germination, for the F1 crosses, 100 randomly selected seeds from each line were surface-sown in 3.5", 370 mL, round pots (9F; Desch PlantPak, Netherlands) using a low nutrient compost (Modular Seed Growing Medium, William-Sinclair, Lincoln, UK). The pots were arranged in plastic trays in standing water (approximately 3-4cm water depth). Trays were placed in controlled environment chambers (Microclima; Snijders Scientific B.V, Tilberg, Netherlands) at the University of Stirling, and maintained at cycles of 16 light-hours (24°C) and 8 dark-hours (16°C) at 70% constant humidity. Seedling emergence was scored daily by counting the cumulative number of individuals in which the cotyledons could be observed.

**Floral and vegetative phenotyping**—To compare the phenotypes of parental and hybrid lines, a second set of seeds from the same lines were planted and germinated as described above. Individual seedlings of each line were transplanted 10 days after germination into 3.5" pots with low nutrient compost and arranged in flooded, plastic trays. Trays were placed at the University of Stirling glasshouses under natural light conditions, with 16 hours of supplemental light provided by compact-fluorescent lamps. Heating was only provided if the temperature inside the glasshouse dropped below 15°C during the day and 10°C at night. Plants were sprayed once to control for an aphid infestation, with 1.5L of diluted Provado Ultimate Bug Killer (20 mL/L) (Bayer Garden, Cambridge, UK). This experiment was carried out between 3 July and 2 October 2012. The date and plant height at the time when the first flower opened was recorded, as well as the following measurements from the first two flowers of each plant, which were taken using digital calipers: (a) corolla width (maximum distance between lateral petal lobes in frontal view); (b) corolla height (maximum distance between upper and lower petal lobes in frontal view); (c)



## Asymmetric hybridization during allopolyploid speciation

corolla throat (size of the opening of the corolla tube taken near the center of the flower); (d) calyx length (measured at the upper sepal); (e) tube length (measured in side view); (f) pedicel length; (g) bract width (width of the subtending leaf at the node of the flower being measured) ; and (h) bract length (including petiole). Nectar production was measured on a subset of flowers using a 50µL calibrated glass pipette (Drummond Scientific Company, Broomall, PA, USA). The fertility of reciprocal crosses was not quantified here, but previous work (Roberts 1964), and our preliminary observations suggest that triploid hybrids are sterile regardless of crossing direction.

**Confirming the success of artificial crosses**—To further check that the individuals produced through artificial crosses were indeed derived from interspecific hybridization, we genotyped all plants used in the morphological analyses. Leaf tissue samples were collected in August-October 2012 and stored in silica gel. DNA was extracted using a modification of the CTAB protocol described in Doyle and Doyle (1990), and quantified with Nanodrop 2000 (Thermo Scientific, Wilmington, DE, USA). We genotyped putative hybrids and parents at six microsatellite loci (ATT240, AAT217, ATT267, AAT230, AAT225, AAT300; (Kelly and Willis, 1998) following the protocol described in Vallejo-Marín and Lye (2013). We used STRand 2.4.59 (Toonen and Hughes, 2001) to analyze fluorescence profiles. Based on the genotyping results, four ML x MG individuals were identified as self-pollinations of the ML maternal plant based on lack of expected heterozygosity, and excluded from subsequent analyses. While we do not have cytological data for individuals included in this experiment, we have confirmed the triploid nature of other putative triploid individuals in the same interspecific crosses using genome size estimates of nuclei stained with propidium iodide, and analyzed in a *Guava easyCyte 5* (Merck Millipore, Watford, U.K.) flow cytometer (Vallejo-Marín, unpublished).

**Data analysis**—The number of seeds produced by the four cross types (MG x MG, MG x ML, ML x MG, and ML x ML) was statistically compared with a general linear model (with normal distribution) with cross type as explanatory variable using the *glm* package in R ver. 3.1.2 (R Core Team, 2015). Pairwise posthoc comparisons among cross types was done using Tukey tests on the fitted model using *multcomp* (Hothorn, Bretz, and Westfall, 2008). Germination curves for each cross type were calculated as the mean of the four studied lines. The proportion of plants that flowered was analyzed using a binomial distribution (logit link) in *glm*, and posthoc pairwise comparisons among cross types done with Tukey tests in *multcomp*. Nectar content and plant height were also analyzed using *glm* with cross type as an explanatory variable, and Tukey tests

## Asymmetric hybridization during allopolyploid speciation

performed in *multcomp*. Floral and leaf traits are presented as mean and standard error for illustration only, and no further general linear model or pairwise posthoc comparisons for cross types were done on these traits. A PCA of the 10 floral and vegetative traits shown in Table 4 was conducted using the function *princomp* on the correlation matrix.

**Chloroplast assembly**—Despite the availability of both nuclear (Hellsten et al., 2013) and mitochondrial (Mower et al., 2012) genomes for *M. guttatus*, no chloroplast genome for any *Mimulus* species had been previously published. Thus we sought to generate an assembly of the entire chloroplast genome using newly generated whole-genome sequences of an advanced inbred line of *M. luteus* var. *luteus* (MLII/MLI2, Table 2). MLII/MLI2 are the same inbred line but are listed separately in Table 2 as they were genotyped via different methods (WGS and sequence capture). Whole genome shotgun reads were trimmed using Trimmomatic v.0.32 (Bolger, Lohse, and Usadel, 2014) with the SLIDINGWINDOW:10:20 and MINLEN:40 parameters. Trimmed reads were mapped against the *Salvia miltiorrhiza* chloroplast genome (NC\_020431.1; Qian et al., 2013) using bowtie2 v.2.1.0 (Langmead and Salzberg, 2012) with the default “very-sensitive-local parameter” set. Mapped reads were assembled using SPAdes v.3.1.0 (Bankevich et al., 2012) with k-mer sizes of 55 and 87 under the “only-assembler” option. The resulting contigs were assembled with the full trimmed data set using *afin* (bitbucket.org/benine/afin) with the following parameters: a stop extension value of 0.1, an initial trim of 100 base pairs to contigs, a maximum extension of 100 bp per loop, and 50 search loops. *afin* spans contigs by trimming contig ends, identifying matching reads to the contig ends, and extending the contigs iteratively while attempting to fuse contigs at each iteration. Ultimately, *afin* was able to assemble the plastome from ~10 contigs to one. The assembled plastome was put into Sequencher 5.0.1 (Genecodes), and the boundaries of the quadripartite regions (large single copy-LSC, inverted repeat B-IRB, small single copy-SSC, and inverted repeat A-IRA) were identified. The final plastome is presented in the LSC-IRB-SSC-IRA format. The final assembly of the plastome was verified through a coverage analysis. Jellyfish v.2.1.3 (Marçais and Kingsford, 2011) was used to estimate 25-mer abundance from the cleaned reads. These abundances were used to map a 25 base pair sliding window of coverage across the assembled plastome. The coverage was found to be uniform and equal for the single copy regions (LSC=373X; SSC=328X) with the inverted repeat having ~2x the coverage of the single copy regions (IR=756X), as expected. DOGMA (Wyman, Jansen, and Boore, 2004) was used to annotate the *Mimulus luteus* plastome. A graph of

## Asymmetric hybridization during allopolyploid speciation

the annotated plastome structure was created using Circos v.0.66 (Krzywinski et al., 2009), as implemented in Verdant ([verdant.iplantcollaborative.org](http://verdant.iplantcollaborative.org)).

**Samples for genomic parentage analysis**—In order to determine the relationships between the cytoplasmic genomes of *M. guttatus* and *M. luteus*, we analyzed previously published and newly generated sequencing data of both parental taxa (Table 2). We included 24 individuals of *M. guttatus* from 10 introduced (UK) and 9 native populations. Within the introduced range we included replicate individuals for four populations (AYR, CER, DBL and HOU), as well as a controlled cross of one of these populations (DBL). For *M. luteus*, we included an inbred line of *M. luteus var. luteus* and one inbred line of *M. luteus var. variegatus* both originally collected in the native range (Chile). The *M. luteus var. luteus* inbred line was represented by two individuals (ML11 and ML12, from the 7<sup>th</sup> and 9<sup>th</sup> inbred generations). In addition, we analyzed *M. luteus s.l.* from two populations in the introduced range in the UK (COL and EVI), including two individuals originating from the same population (COL): a wild collected plant, and an individual from an experimental cross (Table 2). For *M. x robertsii*, we included samples from four natural populations (GIO, LED, NEN and TOR). For *M. peregrinus* we analyzed samples from three populations (GON, STR, and LED), including three individuals from the type populations for the allopolyploid species (LED). As a control, we also analyzed an experimentally-produced “*M. x robertsii*” hybrid obtained by crossing *M. guttatus* x *M. luteus s.l.* (DBL x COL, maternal x paternal parent; CG-1-1 x CS-4-3 = H003b), as well as an S1 synthetic “*M. peregrinus*” allohexaploid produced by colchicine treatment of the H003b “*M. x robertsii*” line (13-SYN-1-JP1). In addition, we also included three samples from taxa closely related to *M. guttatus* in North America (*M. nasutus*, *M. micranthus*, and *M. platycalyx*), plus one outgroup (*M. dentilobus*) (Table 2). In terms of sequencing approach, 16 samples (four of each *M. guttatus*, *M. luteus*, *M. x robertsii*, and *M. peregrinus*) were derived using sequence capture (Vallejo-Marín et al. 2015), and the remaining through whole-genome sequencing obtained from previously published data (10 samples; Puzey and Vallejo-Marín 2014, 13 samples from the NIH sequence read archive (deposited by JGI; <http://www.ncbi.nlm.nih.gov/sra>)), or data newly generated here (six samples). In total we analyzed 45 genomic samples (Table 2).

**Genotyping of plastid genomes**—We used the publicly available *M. guttatus* mitochondrial genome (Mower et al., 2012) (JN098455) or the newly assembled *M. luteus var. luteus* chloroplast genome (this study) as references for base calling and genotyping. All reads were

## Asymmetric hybridization during allopolyploid speciation

aligned to the references using *bowtie2* (Langmead and Salzberg, 2012). Alignments were sorted, duplicates marked and discarded, and read groups added using *Picard* tools (<http://broadinstitute.github.io/picard>). Following alignment filtration, genotypes were called using GATK UnifiedGenotyper (McKenna et al., 2010; DePristo et al., 2011; Auwera et al., 2013) (Appendix S3; see Supplemental Methods with the online version of this article). Following genotyping, indels and heterozygous sites were excluded.

**Filtering of genomic data for phylogenetic analysis**—The 17 chloroplast-derived regions of the *Mimulus guttatus* mitochondrial genome (NC\_018041.1; Mower et al., 2012) were extracted and aligned against the *Mimulus luteus* chloroplast genome using Sequencher v.5.0.1 (<http://www.genecodes.com>). The *Mimulus luteus* chloroplast sequence was trimmed prior to alignment so that only the LSC, IRB, and SSC were present. Alignments were inspected for sequence similarity. Multiple instances where portions of the mitochondrial chloroplast-derived sequences did not have an ordinal alignment with the majority of the sequence were identified. In these cases, the region that did not align was removed and realigned to the full plastome. These chimeric chloroplast-derived sequences may reflect multiple recombination events, and subsequent recombination hotspots of the mitochondrial genome, or they are representative of multiple chloroplast-genome insertion events in the history of the mitochondrial genome. Once aligned, the coordinates of alignment to the chloroplast genome were recorded. Data corresponding to these positions were eventually removed from the data matrix (see below).

Chloroplast sequences were reconstructed from VCF files representing mapping to the *Mimulus luteus* plastome (see above). For each position of the *M. luteus* plastome, the corresponding base in the mapped data set was recorded. If an indel was identified, that position was ignored. Indels are difficult to distinguish from missing data using this method, so we chose to completely ignore them to reduce potentially conflicting signal. Each reconstructed plastome was split into features (protein-coding genes, tRNAs, and rRNAs) and inter-feature regions, which were used for individual alignments and concatenation (see below). Features were identified based on their alignment to known coordinates of the annotated *Mimulus luteus* chloroplast genomes. Chloroplast regions identified in mitochondrial genome were excluded in phylogenetic analyses. This process was done using a Perl script ([https://github.com/mrmckain/AJB\\_2015\\_Mimulus\\_Allopolyploidy](https://github.com/mrmckain/AJB_2015_Mimulus_Allopolyploidy)).

## Asymmetric hybridization during allopolyploid speciation

Mitochondrial sequences were reconstructed in a similar manner to that of the plastid sequences. In this case, the annotation of the *M. guttatus* mitochondrial genomes was used to recognize features in the reconstructed sequences. Regions mapping to the chloroplast-derived regions of the mitochondrial were ignored. As before, reconstructed features and inter-feature regions were used in alignments and then concatenated (see below).

**Phylogenetic analyses**—Individual features and inter-feature regions were aligned using MAFFT v7.029b (Katoh et al., 2005) on auto settings. Individual alignments were concatenated into a single alignment that was assessed for presence/absence of nucleotides at each site. For the chloroplast alignment, if a gap was identified at a site, that site was removed. As with indels, we chose to do this to alleviate the effects of missing data on the phylogeny estimation. The final, un-gapped alignment was 86,843 bp for all 45 samples. The chloroplast phylogeny was estimated using RAxML v8.0.22 (Stamatakis, 2006) under the GTR+Γ model of evolution with 500 bootstrap replicates.

Mitochondrial sequences were processed in a similar fashion to the plastid sequences. The individual feature and inter-feature regions were aligned using MAFFT and concatenated. The mitochondrial sequence data was missing a larger percentage of the total mitochondrial genome, on average, across the 45 sample set. We noted that the sequence-captured samples were extremely low in their total representation of the mitochondrial genome. Filtering out all gapped sites (as above) resulted in a very short alignment of 4,875 bp. After removal of the sequence-captured samples and the WGS sample CG, which demonstrated a low coverage of the mitochondrial genome, the un-gapped alignment of the remaining 28 accessions totaled 402,717 bp. The mitochondrial phylogeny was estimated as above using the reduced 28 sample set.

We included CS-4-3 (*M. luteus*), CG-1-1 (*M. guttatus*), first generation lab generated triploid hybrid HOO3b (CG-1-1 x CS-4-3), and lab generated allohexaploid SYN (13-SYN-1-JP1) to verify that this approach could determine maternal ancestry in a controlled hybridization event. In addition, we also included two *M. luteus* individuals (ML11 and ML12) derived from the same inbred line but genotyped using different methods (WGS and SC, respectively). Alignments and phylogenetic trees are available on Dryad (doi:10.5061/dryad.5q91d).

**Haplotype networks**— We estimated matrilineal haplotype networks for both chloroplast and mitochondria using statistical parsimony (TCS) implemented in PopArt

## Asymmetric hybridization during allopolyploid speciation

(<http://popart.otago.ac.nz>). For this analysis we used a panel of 929 SNPs for the chloroplast, and 1,454 for the mitochondria. Only variable sites were included in the SNP matrix. Indels and sites filtered as described in above section (*Filtering of genomic data for phylogenetic analysis*) were excluded. For chloroplast, we included both whole-genome sequence (WGS) and sequence capture (SC) samples, and for mitochondria we excluded the SC samples as above. For both data sets we excluded sites with more than 5% missing data. This allowed us to analyze 493 sites of which 161 were parsimony-informative for chloroplast, and 784 sites of which 300 were parsimony-informative for the mitochondria.

**Principal component analysis**—We also conducted a principal component analysis (PCA) using the SNP data of the chloroplast and mitochondrial genomes using the *glPca* function in the *R* package *ade4* v. 2.0 (Jombart and Ahmed, 2011). For this analysis we removed genomic regions with low genotyping success, and included only those SNP sites that were successfully genotyped in 90% (41/45) or more individuals. This filtering step removed poorly genotyped genomic regions, and reduced the total number of SNPs from 1454 to 434 for the mitochondrial genome and from 929 to 694 in the chloroplast. For the chloroplast analysis, we also removed a single WGS individual which had poor genotyping success across the genome even after filtering (CG). As expected the amount of missing data across genotyped SNP loci was higher for the SC than for the WGS data set after filtering. For the mitochondria data set, the amount of missing data per site per individuals was 0.0013 for WGS and 0.1080 for SC. For the chloroplast, the same threshold yielded an average amount of missing data per site per individuals of 0.0054 for WGS and 0.0176 for SC.

**Mitochondrial genotyping in natural hybrids**—We used mitochondrial genome sequences to identify potential markers that could help us distinguish *M. guttatus* and *M. luteus* in natural hybrid populations. We sought loci segregating for alternative alleles in *M. luteus* (ML11 and CS) and *M. guttatus* (CG and AYR1) in the sequenced panel. Our goal was to identify fragment length polymorphic sites (indels) that could be scored using microcapillary fragment analysis. To identify segregating indels, we sorted BAM alignments in IGV genome browser, and manually screened for indels that were alternatively fixed between *M. luteus* and *M. guttatus*. We identified three indels (3-4 bp) that distinguished *M. guttatus* and *M. luteus*. Genotyping individuals at these indels produced a distinct haplotype with which we could potentially identify the maternal (mitochondrial) parent of hybrid individuals. To facilitate large-scale genotyping, we designed



## Asymmetric hybridization during allopolyploid speciation

primers flanking each of the indel regions using Primer3Plus (Untergasser et al., 2012), and confirmed their amplification, and sequence in a separate test panel of parental and hybrid individuals using Sanger sequencing. We checked the compatibility of the three primer pairs for pooling them in a single multiplex reaction using Multiplex Manager v 1.2 (Holleley and Geerts, 2009). We then used fluorescently-labelled forward primers (6-FAM, Eurofins Genomics, Germany), and unlabeled reverse primers to generate PCR products in a single multiplex reaction (Type-It, QIAGEN, UK). PCR cycles consisted of a denaturing step of 5 min at 95 ° C, followed by 30 cycles of 95 ° C for 30 s, 55 ° C for 180 s, and 72 ° C for 30 s, and a final elongation step of 30 min at 60 ° C. Fragment length of the PCR products was measured in an ABI3730 sequencer using LIZ500 as a size standard (DNA Sequencing and Services, Dundee, UK). Primer sequences for these mitochondrial markers are given in Appendix S4 (see Supplemental Data with the online version of this article). We genotyped 163 individuals of *M. guttatus* (3 populations), *M. luteus* s.l. (4 populations), *M. x robertsii* (13 populations), and *M. peregrinus* (2 populations), as well as a synthetic allohexaploid line product of an *M. guttatus* (DBL) x *M. luteus* (COL) cross treated with colchicine and selfed for one generation (SYN; Table 2). Between 1 and 15 individuals were genotyped per taxon per population ( $6.8 \pm 3.5$ , mean  $\pm$  SD) (Table 3).

## RESULTS

**Seed set and germination of artificial hybrids**—Reciprocal crosses between *M. guttatus* and *M. luteus* resulted in a relatively high number of seeds per fruit in both directions. The average number of seeds per fruit was  $723 \pm 73$  (mean  $\pm$  SE) for the MG x ML cross, and  $635 \pm 100$  for ML x MG. This difference was not statistically significant (Tukey test,  $P = 0.72$ ; Fig. 1A). Within species crossing yielded  $1,237 \pm 95$ , and  $467 \pm 57$  seeds per fruit for *M. guttatus* and *M. luteus*, respectively (Fig. 1A). In comparison, we found a marked effect of the identity of the maternal parent on seed germination. While approximately half of the seeds of the MG x ML cross germinated ( $0.525 \pm 0.062$ ), only 4% of the ML x MG were able to do so ( $0.042 \pm 0.018$ ) (Fig. 1B). Both parental taxa had high germination proportions ( $0.835 \pm 0.037$  and  $0.825 \pm 0.020$ , for MG x MG, and ML x ML, respectively), although *M. guttatus* seeds achieved maximum germination at a much faster rate (Fig. 1B).



## Asymmetric hybridization during allopolyploid speciation

**Floral and vegetative phenotype of F1 hybrids**—The proportion of hybrid plants that flowered was significantly different depending on crossing direction. The MG x ML cross had a higher proportion of flowering individuals ( $0.983 \pm 0.017$ ,  $n = 60$ ) than the reciprocal cross ( $0.706 \pm 0.114$ ,  $n = 17$ ) (Tukey test  $z = 2.809$ ;  $P = 0.021$ ). The proportion of flowering plants for the MG x ML cross also exceeded both parental crosses ( $0.633 \pm 0.044$ ,  $n = 120$ ; and  $0.741 \pm 0.040$ ,  $n = 120$ ; for MG x MG ( $z = 3.442$ ,  $P < 0.01$ ) and ML x ML ( $z = 2.979$ ;  $P < 0.05$ ), respectively). Moreover, MG x ML hybrids began flowering on average nine days earlier than the reciprocal cross ( $54.91 \pm 0.96$  days,  $63.25 \pm 4.08$ ). Flowering occurred slightly earlier for *M. luteus* ( $53.08 \pm 0.98$ ) than for *M. guttatus* ( $57.77 \pm 1.14$ ).

Among plants that flowered, the MG x ML hybrid achieved the largest stature of all cross types ( $267 \pm 9$ mm, vs.  $139.1 \pm 12.3$ ,  $188.7 \pm 5.0$ , and  $138.9 \pm 5.4$ ; for ML x MG ( $z = 7.491$ ,  $P < 0.001$ ), MG x MG ( $z = 8.431$ ,  $P < 0.001$ ), and ML x ML ( $z = 14.011$ ,  $P < 0.001$ ), respectively; Fig. 2). Flowers and bracts of both types of hybrids were intermediate or larger than the parental values (Table 4, Appendix S5-S6 (see Supplemental Data with the online version of this article)). Both MG x ML and ML x MG hybrids had similar-sized flowers, although hybrids with *M. guttatus* as the maternal parent had longer pedicels and larger bracts (Table 4). Parental taxa differed significantly in nectar production (ML x ML produced more nectar than MG x MG; Tukey test  $z = 4.998$ ;  $P < 0.001$ ), but while MG x ML hybrids produced significantly more nectar than MG x MG ( $z = 6.138$ ;  $P < 0.001$ ), ML x MG hybrids produced larger amounts, but not significantly so ( $z = 2.299$ ;  $P = 0.092$ ), than the *M. guttatus* parent (Fig. 2).

**Analysis of Mimulus chloroplast**—The complete *Mimulus luteus* chloroplast genome was assembled, providing the first published sequence for both the genus *Mimulus* and the family Phrymaceae. The plastome follows the typical quadripartite structure found in most of the photosynthetic angiosperm lineages. The total length of the chloroplast genome is 153,150 bp and is made up of a 84,293 bp LSC, a 17,851 bp SSC, and two 25,503 bp IR regions (Fig. 3). The complete chloroplast sequence is available on Genbank (KU705476). The plastome contains 80 unique protein-coding genes (including *ycf1*, *ycf15*, and *ycf2*), 30 unique tRNAs, and 4 unique rRNAs. No major gene losses or rearrangements were identified relative other published plastomes from Lamiales (Qian et al., 2013; Zhang et al., 2013; Nazereno, Carlsen, and Lohmann 2015).

## Asymmetric hybridization during allopolyploid speciation

**Genomic analysis of hybrid parentage based on cytoplasmic genomes**— On average, sequencing coverage of the cytoplasmic genomes was very high, although also very skewed. For WGS datasets, per individual average read coverage of the mitochondrial and chloroplast genome ranged from 48-940x and 347-5556x with global means of 318 and 2303, respectively. As expected, the sequence capture datasets had high read coverage but totals were considerably lower than the WGS datasets (Appendix S2). Per individual average read coverage for SC datasets mapped against the mitochondrial and chloroplasts genomes from 6-13x and 55-112x with means of 9x and 85x, respectively. The chloroplast has considerably greater read depth than the mitochondria. The fraction of genotyped bases varied considerably between the WGS and SC dataset (Appendix S7; see Supplemental Data with the online version of this article). On average, 68% and 80% of chloroplast sites were genotyped in the SC and WGS datasets, respectively (fraction of sites genotyped calculated from entire mitochondrial and chloroplast datasets before filtering). The mitochondria exhibited larger span between the average percentage of called bases between the SC and WGS datasets with 57% and 85% called.

The chloroplast tree had relatively high resolution and strong support at the taxon level (i.e., *M. guttatus* vs. *M. luteus*), but was less useful to resolve relationships between populations within species (Fig. 4), suggesting recent divergence of populations. A single monophyletic *M. luteus* clade (minus MLv) is well supported in the chloroplast tree. The mitochondrial dataset does not support *M. luteus* monophyly. Within the chloroplast tree, *M. peregrinus* (allopolyploid) forms two distinct groups and are more closely related to geographically proximate sterile triploid hybrids. *M. x robertsii* sample (LED1), and *M. peregrinus*, LED2, LED3, and LED4, are closely related and all collected from Leadhills, Scotland. *M. peregrinus* sample GON, also falls within the above group and is from nearby Glengonnar, Scotland. Based on the chloroplast data, the other naturally *M. peregrinus* sample included in this analysis, STR, also falls within a clade with geographically proximate *M. x robertsii* (TOR). The relationship of *M. x robertsii* and *M. peregrinus* supports the finding of Vallejo-Marín *et al.* (2015) using a different aspect of the genomic data, i.e., the nuclear component of the genome. Naturally occurring allopolyploids (LED2, LED3 LED4, GON, and STR) as well as naturally occurring hybrids (LED1, TOR, NEN, GIO) are more closely related to *M. guttatus* than they are to *M. luteus* based on chloroplast analysis. The mitochondrial tree topology indicates that naturally occurring allopolyploid LED is nested within a *M. guttatus* clade. The chloroplast tree places ML11 and ML12 (samples derived from the same inbred lines but genotyped using different methods) sister to each other. SYN and

# Asymmetric hybridization during allopolyploid speciation

515 HOO, triploid hybrid and allohexaploid samples, respectively, derived from an artificial cross  
516 between CG x CS, fall within the same clade in both the chloroplast and mitochondrial trees. The  
517 maternal parent of these lines (CG) is not sister to the SYN and HOO samples as expected. This  
518 is most likely due to homoplasy affecting tree reconstruction due to relatively low sequence  
519 divergence between accessions.

520 The haplotype network of the chloroplast showed that both *M. x robertsii* and *M. peregrinus*  
521 samples have identical or nearly identical haplotypes to *M. guttatus* (Fig. 5A). Samples of *M.*  
522 *peregrinus* from Leadhills (LED2, LED3, LED4) and nearby Glengonnar (GON) share a  
523 haplotype with *M. x robertsii* from Leadhills (LED1). Samples of *M. peregrinus* from Orkney  
524 (STR) belong to a closely related haplotype that also includes *M. x robertsii* from Orkney (TOR),  
525 northern England (rob3), and the Outer Hebrides (rob4). This haplotype also includes most of the  
526 *M. guttatus* samples from the British Isles, the synthetic triploid and hexaploid (HOO and SYN),  
527 and one native population (AHQT). Samples of *M. luteus s.l.* from the British Isles (CS and COL,  
528 Coldstream; EVI, Evie) fall in a distinct group of haplotypes separated from other *Mimulus* by  
529 several mutational steps, and which also includes the two replicates from the *M. luteus var. luteus*  
530 inbred line (ML11 and ML12; Chile). As in the phylogenetic reconstruction, the sample from a  
531 Chilean *M. luteus var. variegatus* (MLv) is situated near *M. guttatus* haplotypes. The  
532 mitochondrial network, which excludes all SC samples due to low genotyping success, shows the  
533 single individual of wild *M. peregrinus* (LED2) as part of a haplotype that includes most of the  
534 British *M. guttatus* as well as the synthetic triploid and hexaploid accessions (HOO and SYN).  
535 Both *M. luteus var. luteus* (ML11) and *M. luteus s.l.* (CS) are separated from all other *Mimulus* by  
536 a large number of mutational steps (Fig. 5B).

537 The PCA of both chloroplast and mitochondria data sets also showed that *M. x robertsii* and *M.*  
538 *peregrinus* cluster together with *M. guttatus* samples (Fig. 6). In the chloroplast PCA, the two  
539 known origins of *M. peregrinus* (Leadhills and Orkney) fall in separate clusters with *M. guttatus*,  
540 each of them associated with local *M. x robertsii* samples (Fig 6A, Appendix S8; see  
541 Supplemental Data with the online version of this article). In the mitochondrial PCA, there is not  
542 enough resolution to differentiate these two origins, and all *M. peregrinus* and *M. x robertsii*  
543 samples fall in the same cluster, along with other native and introduced *M. guttatus* (Fig. 6B,  
544 Appendix S9; see Supplemental Data with the online version of this article). As above, the *M.*

## Asymmetric hybridization during allopolyploid speciation

545 *luteus* var. *variegatus* sample from Chile (MLv) is closer to *M. guttatus* samples than to other *M.*  
546 *luteus*.

547 **Natural frequency of *M. guttatus* as maternal parent**—We successfully genotyped 163  
548 *Mimulus spp.* individuals from 21 populations and one synthetic line at three mitochondrial loci  
549 (Table 3). We recovered only two haplotypes: 237/296/313 and 240/292/317 (fragment size in  
550 base pairs for markers mit-259, mit-262, and mit-357, respectively). For *M. luteus*, we genotyped  
551 10 individuals, all of which had haplotype 240/292/317. For *M. guttatus*, we genotyped 14  
552 individuals from three populations of which all but one had haplotype 237/296/313. The  
553 exceptional individual belonged to population DBL (Table 3). We genotyped 110 individuals of  
554 *M. x robertsii* from 12 populations across the U.K. From these, 107 had haplotype 237/296/313  
555 (“*M. guttatus* haplotype”), while three individuals from population NEN had the other haplotype.  
556 Finally, the 23 individuals of *M. peregrinus* sampled in populations STR and LED also had the  
557 haplotype 237/296/313. The synthetic allohexaploid line created with *M. guttatus* as the maternal  
558 parent, had haplotype 237/296/313 as expected.

## 559 DISCUSSION

560 Our study combines experimental crosses, genomic analyses of chloroplast and mitochondrial  
561 genomes, and surveys of natural hybrid populations to demonstrate how a strongly asymmetric  
562 post-zygotic hybridization barrier has shaped the origin of the recently formed allopolyploid  
563 species *Mimulus peregrinus*, and its triploid ancestor *M. x robertsii* (= *M. guttatus* x *M. luteus*).  
564 Thus our study confirms early crossing experiments (Roberts, 1964; Parker, 1975), and adds to a  
565 growing list of exceptions to the “rule” of poorly-performing paternal-excess crosses (Table 1;  
566 Appendix S1; see Supplemental Data with the online version of this article). Specifically, we  
567 showed that viable hybrids are considerably more likely to be produced when diploid *M. guttatus*  
568 is used as the maternal parent and tetraploid *M. luteus* as the paternal parent (MG x ML), than in  
569 the opposite direction (ML x MG). We showed that MG x ML hybrids are larger in size than the  
570 parental taxa and the reciprocal hybrid ML x MG. The MG x ML hybrids also flowered earlier  
571 and produced more nectar than their *M. guttatus* parents. Motivated by this observed asymmetry  
572 of hybridization, we used previously available genomic sequences, and developed novel genomic  
573 resources, including the first assembled chloroplast in the genus *Mimulus* and in the family  
574 Phrymaceae, to show that most individuals in natural populations of the triploid hybrid *M. x*

## Asymmetric hybridization during allopolyploid speciation

575 *robertsii* have *M. guttatus* as their maternal parent. As expected, *M. peregrinus*, which arose by  
576 genome duplication from *M. x robertsii*, also has *M. guttatus* as its maternal parent. Beyond  
577 revealing the asymmetric origin of *M. x robertsii* and *M. peregrinus*, our study shows the general  
578 potential of exploiting cytoplasmic genome data from both targeted and whole-genome sequence  
579 projects (Straub et al., 2012; Dodsworth, 2015), to investigate the evolution and speciation of  
580 polyploid and hybrid taxa.

581 **Pattern of hybridization asymmetry: seed viability and germination**—Cytonuclear  
582 incompatibilities and differences in ploidy level, or a combination of both, can result in post-  
583 zygotic asymmetric hybridization (Tiffin, Olson, and Moyle, 2001; Köhler, Scheid, and Erilova,  
584 2010; Scott, Tratt, and Bolbol, 2013). We currently cannot distinguish between these two classes  
585 of mechanisms to explain the observed pattern of asymmetric hybridization leading to *M. x*  
586 *robertsii* and *M. peregrinus*. However, analysis of the morphology of hybrid seeds obtained in  
587 reciprocal crosses may offer some insight into the mechanisms of such asymmetry. For example,  
588 intra-specific hybridization between diploid and tetraploid *Arabidopsis thaliana* has shown that  
589 crosses with maternal excess ( $4x - 2x$ ) yield smaller seed sizes than the reciprocal paternal excess  
590 cross ( $2x - 4x$ ) (Scott, Tratt, and Bolbol, 2013). The seed size differences are thought to result  
591 from misregulation of imprinted genes that control growth and cell division in the endosperm  
592 (Köhler and Kradolfer, 2011; Schatlowski and Köhler, 2012; Lafon-Placette and Köhler, 2015).  
593 Paternal excess may cause endosperm over-proliferation and failed endosperm cellularization  
594 (resulting in large seeds), while maternal excess results in endosperm proliferation and small  
595 seeds (Haig and Westoby, 1991; Scott et al., 1998; Bushell, Spielman, and Scott, 2003; Scott,  
596 Tratt, and Bolbol, 2013).

597 As a first step toward understanding the mechanism of reproductive asymmetry in *Mimulus*, we  
598 compared seed size in the 16 controlled crosses used in the phenotypic experiment. These crosses  
599 included four accessions of each parental taxa and the reciprocal hybrid crosses (Appendix S2;  
600 see Supplemental Data with the online version of this article). We estimated seed size as seed  
601 area obtained from digital images of 300-600 seeds per cross type (Appendix S10; see  
602 Supplemental Data with the online version of this article). Our results indicate that although both  
603 types of hybrids have smaller seeds than the parental taxa, the ML x MG cross produces larger (if  
604 mostly inviable) seeds than the reciprocal (and more viable) MG x ML cross (Appendix S10; see  
605 Supplemental Data with the online version of this article). This suggests that interploidy crosses

## Asymmetric hybridization during allopolyploid speciation

in *Mimulus* do not mimic the seed phenotypes of interploidy crosses in *Arabidopsis* (Scott, Tratt, and Bolbol, 2013). Further analyses of the morphology and histology of interploidy reciprocal crosses of *M. guttatus* x *M. luteus* are needed to elucidate the mechanistic and genetic basis of post-zygotic hybridization asymmetry in this group.

**Pattern of hybridization asymmetry: adult plant phenotype**—Most previous experimental studies comparing the viability of asymmetrically produced hybrids have focused on the immediate consequences of intrinsic post-zygotic incompatibilities at the seed and seedling stage (seed number and seed germination). However, as we have shown, surviving hybrids may also differ in their adult phenotypes depending on cross direction. Although our sample size is small, our results show that paternal-excess *Mimulus* triploids possessed characteristics potentially associated with high extrinsic fitness, including larger plant size. Paternal excess hybrids also flowered earlier, and produced more nectar than maternal-excess triploids, but the direct effects of these traits on hybrid fitness are expected to be negligible given that *M. x robertsii* is sexually sterile (Roberts, 1964; Stace, 2010), and this sterility does not differ in synthetic hybrids created using reciprocal crosses (Roberts 1964, p. 73). A major gap in our knowledge is whether phenotypic differences among reciprocal hybrids observed in greenhouse conditions, translate to performance differences in the field, and further studies on the ecology and fitness of reciprocal hybrids and their parents are needed. It would also be important to compare the morphology of triploid *M. x robertsii* and its allohexaploid derivative *M. peregrinus*, in order to assess the effects of genome duplication on the phenotype. Preliminary field observations suggest that allopolyploids are larger in size for some morphological traits such as flower size (Vallejo-Marín, pers. obs.). The combination of *Mimulus* genomic and transgenic resources (Wu et al., 2008; Hellsten et al., 2013; Yuan et al., 2013; Twyford et al., 2015) with a rich ecological knowledge base, makes the naturalized hybrids and neopolyploids of the British Isles an exciting model for connecting molecular mechanisms of interploidy asymmetry to observed patterns of speciation in the wild.

**Genetic ancestry of *M. x robertsii* and *M. peregrinus***—Regardless of mechanism, our study seems to be an exception to the general pattern in which viable inter-ploidy hybrids are more likely to be produced when the maternal parent is of higher ploidy level than the paternal one (maternal excess; Stebbins, 1957; Ramsey and Schemske, 1998). Both chloroplast and mitochondrial genomic analyses clearly show that the triploid and hexaploid individuals cluster



## Asymmetric hybridization during allopolyploid speciation

more closely with *M. guttatus* than with any native or introduced *M. luteus* (Figs. 4, 5, 6). The genomic data also shows that even whole-genome sequences are unable to completely separate *M. guttatus* and *M. luteus*, which may reflect incomplete lineage sorting between these relatively closely related taxa (Madison and Knowles, 2006). Moreover, the origin of *M. luteus* itself is unknown, but nuclear genomic data suggests that this taxon has a hybrid origin (Vallejo-Marín et al., 2015), perhaps with a *M. guttatus*-like ancestor (Mukherjee and Vickery, 1962). If the putative allopolyploid *M. luteus* has had multiple origins, then the simple expectation of reciprocal monophyly for the plastid genomes of *M. luteus* and *M. guttatus* may not be met. Solving the mystery of the origin of *M. luteus* and its relationship with *M. guttatus* and related taxa will require detailed analyses of natural populations throughout the native South American range.

Our survey of hybrid *Mimulus* populations across the British Isles using three mitochondrial loci also supports *M. guttatus* as the maternal parent of *M. x robertsii* and *M. peregrinus*. Of 114 triploid *M. x robertsii* from 13 populations, and 27 individuals from three populations of the hexaploid *M. peregrinus* that were genotyped at these three mitochondrial loci, all but three *M. x robertsii*, individuals from a single population had maternal haplotypes that could be confidently assigned to *M. guttatus*. The three individuals of *M. x robertsii* (all from population NEN) that had *M. luteus* mitochondrial haplotypes (Table 3) pose an exception to the general pattern detected here. An *M. luteus*-like maternal haplotype in hybrids could be explained in a number of ways. First, it could simply be due to contamination during genotyping. However, we re-extracted and re-genotyped this samples and confirmed the mitochondrial haplotype. Second, the three samples could have been mistakenly identified as *M. x robertsii* but instead belong to *M. luteus*. We think this is also unlikely as plants were morphologically identified on site, and we have also conducted surveys of this population (NEN) in 2010, 2011, and 2013, and *M. luteus* has never been observed in this or nearby populations. Third, the haplotypes in these three hybrids could arise via introgression from *M. luteus*. Introgression across ploidy barriers has been shown for nuclear markers in other species (Chapman and Abbott, 2010), and could possibly occur at the mitochondrial level as well. Although, we cannot rule out this possibility, the lack of local *M. luteus* (the nearest known *M. luteus* natural population is ~100km north), and principally the fact that hybrids are not known to set seed (i.e., are almost completely sterile; Roberts, 1964; Vallejo-Marín, 2012), makes the introgression scenario unlikely. Fourth, the “*M. luteus*” haplotype in hybrids could be explained by incomplete lineage sorting of ancestral polymorphisms between *M.*



## Asymmetric hybridization during allopolyploid speciation

669 *guttatus* and *M. luteus* (Twyford and Ennos, 2012). We cannot currently rule out ancestral  
670 polymorphism, and this remains a distinct possibility given the observations that a single  
671 individual of *M. guttatus* (DBL) bears a mitochondrial haplotype otherwise characteristic of *M.*  
672 *luteus* (Table 2). Similarly the mitochondrial haplotype for the British individual of *M. luteus* s.l.  
673 (CS) nested within the *M. guttatus* clade also suggests incomplete lineage sorting. Given the  
674 limited sampling of parental genotypes, incomplete lineage sorting remains a very likely  
675 possibility. Fifth, it is possible that homoplasy resulting from the sequences converging on a  
676 similar haplotype (especially if the sequences are not that distinct) could explain this pattern.  
677 Finally, a simpler explanation may be that although the majority of hybrids are produced when *M.*  
678 *guttatus* is the maternal parent, occasionally, the opposite cross can yield viable offspring. Indeed,  
679 our experimental results show that viable hybrids in the ML x MG direction are produced albeit  
680 with low probability (Figure 1).

681 **Skimming of cytoplasmic genomes** — Acquisition of complete organellar genomes is  
682 increasingly feasible with the advent of “genome skimming” techniques associated with next-  
683 generation sequencing projects. In fact, mitochondrial sequences usually represent 1-5% of the  
684 reads obtained in such projects (Steele, et al., 2012; Smith, 2015) and are often discarded as  
685 contamination during nuclear genomic analyses. Our study showed that data generated by whole-  
686 genome sequencing contain enough cytoplasmic ‘contamination’ to yield between 1,515 and 208-  
687 fold mean coverage of the chloroplast and mitochondria, respectively. Even the approach of  
688 sequence capture, in which specific (nuclear) regions were targeted (Vallejo-Marín et al., 2015)  
689 contained sufficient reads to build large contigs of both chloroplast and mitochondrial genes  
690 (86,843 bp and 402,717 bp, respectively). As expected, however, the sequence capture data did  
691 not allow us to genotype all the same sites in all individuals. The limited coverage of specific  
692 sites was particularly acute for the mitochondrial genome, which reduced its utility in some of the  
693 analyses conducted here. Our results suggest that using off-targeted reads from sequence capture  
694 approaches may be sufficient to generate moderate numbers of genetic markers (e.g., Fig. 6), but  
695 this approach is of limited utility when coverage of large numbers of sites across multiple  
696 individuals is required (e.g., Figs. 4, 5).

697 **The *Mimulus* chloroplast genome** — Shallow whole-genome sequencing (also referred to as  
698 genome skimming) allowed us to reconstruct the chloroplast genome of *M. luteus*. The structure  
699 and gene content of this genome follows what has been seen for other taxa in Lamiales (Nazareno

## Asymmetric hybridization during allopolyploid speciation

et al., 2015), including that of *Utricularia gibba* (Ibarra-Laclette et al., 2013), a species known for a diminutive nuclear genome. The relatively constant architecture and gene content identified across multiple lineages of the order Lamiales suggests that there may be selection for maintenance of gene content and structure relative to other eudicots lineages like saguaro (Sanderson et al., 2015) and legumes (Saski et al., 2005). A more comprehensive taxon sampling of chloroplast genomes is needed throughout the Lamiales and all angiosperm to truly understand the dynamics and evolution of this vital organelle.

The use of genome skimming has repeatedly proven to be a useful technique for acquiring either complete gene sets (e.g. Washburn et al., 2015) or full plastomes (e.g. Bock et al., 2013). Here we demonstrate the utility of a single plastome and mitochondrial genome as anchors to identify organellar genome sequences rapidly from genome skimming data. Though full plastid and mitochondrial genome sequences were not recovered, a large proportion of each genome was and those regions were identified to annotated features and alignable providing resolution of relationships at the population level. Future work in the group will include *de novo* assembly of whole chloroplast genomes across the genus providing valuable resources for population-level studies of hybridization and polyploidy.

**Conclusions** —The value of genome skimming for general phylogenetic analyses is well recognized (e.g. Hahn, Bachmann, and Chevreux, 2013). We demonstrate that the analysis of the entire mitochondrial and chloroplast genomes can yield information to infer the maternal ancestry of a hybrid and neo-allopolyploid derived from recently diverged taxa (Beardsley and Olmstead, 2002; Nie et al., 2006). However, our study also shows that even whole genome sequences might only imperfectly resolve phylogenetic relationships between closely related species. Therefore, genomic analysis of hybrid ancestry can be significantly strengthened by experimental crossing data such as the one conducted here. Exploration of reproductive isolation asymmetry across the plant kingdom through genome-skimming may allow for a better understanding of the origin of hybrid and allopolyploid species. Connecting the genomic and molecular underpinnings of reproductive asymmetry to the morphological and ecological consequences of asymmetric barriers will ultimately generate a better solution to the puzzle of allopolyploids' evolutionary success.

## ACKNOWLEDGEMENTS

## Asymmetric hybridization during allopolyploid speciation

We thank H.E. O'Brien for comments and suggestions on haplotype analysis. We thank two anonymous reviewers for comments on a previous version of this manuscript. This work was supported in part by a UK Natural Environment Research Council grant (NERC, NE/J012645/1) and a Carnegie Trust Travel grant to MVM, and a Suzann Wilson Matthews Research Award to JRP.

## REFERENCES

- AUWERA, G. A., M. O. CARNEIRO, C. HARTL, R. POPLIN, G. DEL ANGEL, A. LEVY-MOONSHINE, T. JORDAN, et al. 2013. From FastQ data to high-confidence variant calls: the genome analysis toolkit best practices pipeline. *Current Protocols in Bioinformatics*: 11.10. 11-11.10. 33.
- BANKEVICH, A., S. NURK, D. ANTIPOV, A. A. GUREVICH, M. DVORKIN, A. S. KULIKOV, V. M. LESIN, et al. 2012. SPAdes: a new genome assembly algorithm and its applications to single-cell sequencing. *Journal of Computational Biology* 19: 455-477.
- BARKER, M. S., N. ARRIGO, A. E. BANIAGA, Z. LI, AND D. A. LEVIN. 2015. On the relative abundance of autopolyploids and allopolyploids. *New Phytologist*: In press.
- BEARDSLEY, P. M., AND R. G. OLMSTEAD. 2002. Redefining Phrymaceae: The placement of *Mimulus*, tribe Mimuleae and Phryma. *American Journal of Botany* 89: 1093-1102.
- BEHREND, A., A. GLUSCHAK, A. PRZYBYLA, AND A. HOHE. 2015. Interploid crosses in heather (*Calluna vulgaris*). *Scientia Horticulturae* 181: 162-167.
- BOCK, D. G., N. C. KANE, D. P. EBERT, AND L. H. RIESEBERG. 2013. Genome skimming reveals the origin of the Jerusalem Artichoke tuber crop species: neither from Jerusalem nor an artichoke. *New Phytologist* 201: 1021-1030.
- BOLGER, A. M., M. LOHSE, AND B. USADEL. 2014. Trimmomatic: a flexible trimmer for Illumina sequence data. *Bioinformatics*: btu170.
- BURTON, T. L., AND B. C. HUSBAND. 2000. Fitness differences among diploids, tetraploids, and their triploid progeny in *Chamerion angustifolium*: mechanisms of inviability and implications for polyploid evolution. *Evolution* 54: 1182-1191.
- BUSHELL, C., M. SPIELMAN, AND R. J. SCOTT. 2003. The basis of natural and artificial postzygotic hybridization barriers in *Arabidopsis* species. *The Plant Cell* 15: 1430-1442.
- CASTRO, S., Z. MÜNZBERGOVÁ, J. RAABOVÁ, AND J. LOUREIRO. 2011. Breeding barriers at a diploid-hexaploid contact zone in *Aster amellus*. *Evolutionary Ecology* 25: 795-814.
- CHAPMAN, M. A., AND R. J. ABBOTT. 2010. Introgression of fitness genes across a ploidy barrier. *New Phytologist* 186: 63-71.
- CHEUNG, K. W., F. M. RAZEQ, C. A. SAUDER, T. JAMES, AND S. L. MARTIN. 2015. Bidirectional but asymmetrical sexual hybridization between *Brassica carinata* and *Sinapis arvensis* (Brassicaceae). *Journal of plant research* 128: 469-480.
- COMAI, L. 2005. The advantages and disadvantages of being polyploid. *Nature Reviews Genetics* 6: 836-846.
- COOLEY, A. M., AND J. H. WILLIS. 2009. Genetic divergence causes parallel evolution of flower color in Chilean *Mimulus*. *New Phytologist* 183: 729-739.
- DEPRISTO, M. A., E. BANKS, R. POPLIN, K. V. GARIMELLA, J. R. MAGUIRE, C. HARTL, A. A. PHILIPPAKIS, et al. 2011. A framework for variation discovery and genotyping using next-generation DNA sequencing data. *Nature Genetics* 43: 491-498.

# Asymmetric hybridization during allopolyploid speciation

- 773 DINU, I., R. HAYES, R. KYNAST, R. PHILLIPS, AND C. THILL. 2005. Novel inter-series hybrids in  
774 *Solanum*, section Petota. *Theoretical and Applied Genetics* 110: 403-415.
- 775 DODSWORTH, S. 2015. Genome skimming for next-generation biodiversity analysis. *Trends in*  
776 *Plant Science* 20: 525-527.
- 777 DOYLE, J. J., AND J. L. DOYLE. 1990. Isolation of plant DNA from fresh tissue. *Focus* 12: 13-15.
- 778 EDGER, P., K. CHILDS, A. PLATTS, C. PIRES, A. M. COOLEY, AND J. PUZEY. *in prep.* Transposon  
779 density contributes to homeolog specific gene expression in allopolyploid monkeyflower  
780 (*Mimulus luteus*)
- 781 FIELD, D., D. AYRE, R. WHELAN, AND A. YOUNG. 2011. Patterns of hybridization and  
782 asymmetrical gene flow in hybrid zones of the rare *Eucalyptus aggregata* and common *E.*  
783 *rubida*. *Heredity* 106: 841-853.
- 784 GRANT, A. L. 1924. A monograph of the genus *Mimulus*. *Annals of the Missouri Botanical*  
785 *Garden* 11: 99-389.
- 786 GREINER, R., AND C. OBERPRIELER. 2012. The role of inter-ploidy block for reproductive  
787 isolation of the diploid *Leucanthemum pluriflorum* Pau (Compositae, Anthemideae) and  
788 its tetra- and hexaploid relatives. *Flora-Morphology, Distribution, Functional Ecology of*  
789 *Plants* 207: 629-635.
- 790 HAHN, C., L. BACHMANN, AND B. CHEVREUX. 2013. Reconstructing mitochondrial genomes  
791 directly from genomic next-generation sequencing reads—a baiting and iterative  
792 mapping approach. *Nucleic Acids Research* 41: e129-e129.
- 793 HAIDER, N. 2011. Chloroplast-specific universal primers and their uses in plant studies. *Biologia*  
794 *Plantarum* 55: 225-236.
- 795 HAIG, D., AND M. WESTOBY. 1989. Parent-specific gene expression and the triploid endosperm.  
796 *American Naturalist*: 147-155.
- 797 HAIG, D., AND M. WESTOBY. 1991. Genomic imprinting in endosperm: its effect on seed  
798 development in crosses between species, and between different ploidies of the same  
799 species, and its implications for the evolution of apomixis. *Philosophical Transactions of*  
800 *the Royal Society of London Series B* 333: 1-13.
- 801 HELLSTEN, U., K. WRIGHT, J. JENKINS, S. SHU, Y. YUAN, S. WESSLER, J. SCHMUTZ, et al. 2013.  
802 Fine-scale variation in meiotic recombination in *Mimulus* inferred from population  
803 shotgun sequencing. *Proceedings of the National Academy of Sciences of the United*  
804 *States of America* 110: 19478-19482.
- 805 HERSCH-GREEN, E. I. 2012. Polyploidy in Indian paintbrush (*Castilleja*; Orobanchaceae) species  
806 shapes but does not prevent gene flow across species boundaries. *American Journal of*  
807 *Botany* 99: 1680-1690.
- 808 HOLLELEY, C. E., AND P. G. GEERTS. 2009. Multiplex Manager 1.0: a cross-platform computer  
809 program that plans and optimizes multiplex PCR. *BioTechniques* 46: 511-517.
- 810 HOTHORN, T., F. BRETZ, AND P. WESTFALL. 2008. Simultaneous inference in general parametric  
811 models. *Biometrical Journal* 50: 346-363.
- 812 <http://www.genecodes.com>. Sequencher sequence analysis software, version 5.0.1. website:  
813 <http://www.genecodes.com>.
- 814 HUSBAND, B. C. 2004. The role of triploid hybrids in the evolutionary dynamics of mixed-ploidy  
815 populations. *Biological Journal of the Linnean Society* 82: 537-546.
- 816 IBARRA-LACLETTE, E., E. LYONS, G. HERNÁNDEZ-GUZMÁN, ET AL. 2013. Architecture and  
817 evolution of a minute plant genome. *Nature* 498: 94-98.
- 818 JOMBART, T., AND I. AHMED. 2011. adegenet 1.3-1: new tools for the analysis of genome-wide  
819 SNP data. *Bioinformatics* 27: 3070-3071.
- 820 KATO, K., K.-I. KUMA, H. TOH, AND T. MIYATA. 2005. MAFFT version 5: improvement in  
821 accuracy of multiple sequence alignment. *Nucleic Acids Research* 33: 511-518.

# Asymmetric hybridization during allopolyploid speciation

- 822 KELLY, A. J., AND J. H. WILLIS. 1998. Polymorphic microsatellite loci in *Mimulus guttatus* and  
823 related species. *Molecular Ecology* 7: 769-774.
- 824 KÖHLER, C., AND D. KRADOLFER. 2011. Epigenetic mechanisms in the endosperm and their  
825 consequences for the evolution of flowering plants. *Biochimica et Biophysica Acta*  
826 (*BBA*)-*Gene Regulatory Mechanisms* 1809: 438-443.
- 827 KÖHLER, C., O. M. SCHEID, AND A. ERILOVA. 2010. The impact of the triploid block on the  
828 origin and evolution of polyploid plants. *Trends in Genetics* 26: 142-148.
- 829 KRZYWINSKI, M., J. SCHEIN, I. BIROL, J. CONNORS, R. GASCOYNE, D. HORSMAN, S. J. JONES,  
830 AND M. A. MARRA. 2009. Circos: an information aesthetic for comparative genomics.  
831 *Genome Research* 19: 1639-1645.
- 832 LAFON-PLACETTE, C., AND C. KÖHLER. 2015. Epigenetic mechanisms of postzygotic  
833 reproductive isolation in plants. *Current Opinion in Plant Biology* 23: 39-44.
- 834 LANGMEAD, B., AND S. L. SALZBERG. 2012. Fast gapped-read alignment with Bowtie 2. *Nature*  
835 *Methods* 9: 357-359.
- 836 LEVIN, D. A. 2002. *The role of chromosomal change in plant evolution*. Oxford University Press  
837 on Demand.
- 838 MADDISON, W. P., AND L. L. KNOWLES. 2006. Inferring phylogeny despite incomplete lineage  
839 sorting. *Systematic Biology* 55: 21-30.
- 840 MALLEY, J. 2007. Hybrid speciation. *Nature* 446: 279-283.
- 841 MARÇAIS, G., AND C. KINGSFORD. 2011. A fast, lock-free approach for efficient parallel  
842 counting of occurrences of k-mers. *Bioinformatics* 27: 764-770.
- 843 MCKENNA, A., M. HANNA, E. BANKS, A. SIVACHENKO, K. CIBULSKIS, A. KERNYTSKY, K.  
844 GARIMELLA, et al. 2010. The Genome Analysis Toolkit: a MapReduce framework for  
845 analyzing next-generation DNA sequencing data. *Genome Research* 20: 1297-1303.
- 846 MIYASHITA, T., AND Y. HOSHINO. 2015. Interploid and intraploid hybridizations to produce  
847 polyploid Haskap (*Lonicera caerulea* var. *emphylocalyx*) plants. *Euphytica* 201: 15-27.
- 848 MOWER, J. P., A. L. CASE, E. R. FLORO, AND J. H. WILLIS. 2012. Evidence against equimolarity  
849 of large repeat arrangements and a predominant master circle structure of the  
850 mitochondrial genome from a monkeyflower (*Mimulus guttatus*) lineage with cryptic  
851 CMS. *Genome Biology and Evolution* 4: 670-686.
- 852 MUKHERJEE, B. B., AND R. K. VICKERY. 1962. Chromosome counts in the section *Simiolus* of  
853 the genus *Mimulus* (Scrophulariaceae). V. The chromosomal homologies of *M. guttatus*  
854 and its allied species and varieties. *Madroño* 16: 141-172.
- 855 NAZARENO, A. G., M. CARLSEN, AND L. G. LOHMANN. 2015. Complete chloroplast genome of  
856 *Tanaecium tetragonolobum*: The first Bignoniaceae plastome. *PloS ONE* 10: e0129930.
- 857 NGHIEM, Q., J. HARBARD, C. HARWOOD, A. GRIFFIN, T. HA, AND A. KOUTOULIS. 2013. Pollen-  
858 pistil interactions between autotetraploid and diploid *Acacia mangium* and diploid *A.*  
859 *auriculiformis*. *Journal of Tropical Forest Science* 25: 96-110.
- 860 NIE, Z., H. SUN, P. BEARDSLEY, R. OLMSTEAD, AND J. WEN. 2006. Evolution of biogeographic  
861 disjunction between eastern Asia and eastern North America in *Phryma* (Phrymaceae).  
862 *American Journal of Botany* 93: 1343-1356.
- 863 OTTO, S. P., AND J. WHITTON. 2000. Polyploid incidence and evolution. *Annual Review of*  
864 *Genetics* 34: 401-437.
- 865 PARKER, P. F. 1975. *Mimulus* in Great Britain - A cytotaxonomic note. *New Phytologist* 74: 155-  
866 160.
- 867 PETIT, R. J., C. BODÉNÈS, A. DUCOUSSO, G. ROUSSEL, AND A. KREMER. 2004. Hybridization as  
868 a mechanism of invasion in oaks. *New Phytologist* 161: 151-164.



# Asymmetric hybridization during allopolyploid speciation

- PRESTON, C. D., D. A. PEARMAN, AND T. D. DINES. 2002. *New atlas of the British and Irish flora*. An atlas of the vascular plants of Britain, Ireland, the Isle of Man and the Channel Islands. Oxford University Press.
- PUZEY, J., AND M. VALLEJO-MARÍN. 2014. Genomics of invasion: diversity and selection in introduced populations of monkeyflowers (*Mimulus guttatus*). *Molecular Ecology* 23: 4472-4485.
- RHYMER, J. M., AND D. SIMBERLOFF. 1996. Extinction by hybridization and introgression. *Annual review of ecology and systematics*: 83-109.
- QIAN, J., J. SONG, H. GAO, Y. ZHU, J. XU, X. PANG, H. YAO, et al. 2013. The complete chloroplast genome sequence of the medicinal plant *Salvia miltiorrhiza*. *PLoS One* 8: e57607.
- R CORE TEAM. 2015. R: A language and environment for statistical computing. website: <http://www.R-project.org/>.
- RAMSEY, J., AND D. W. SCHEMSKE. 1998. Pathways, mechanisms, and rates of polyploid formation in flowering plants. *Annual Review of Ecology and Systematics* 29: 467-501.
- RIESEBERG, L. H. 1997. Hybrid origins of plant species. *Annual Review of Ecology and Systematics* 28: 359-389.
- ROBERTS, R. 1964. *Mimulus* hybrids in Britain. *Watsonia* 6: 70-75.
- ROCCAFORTE, K., S. E. RUSSO, AND D. PILSON. 2015. Hybridization and reproductive isolation between diploid *Erythronium mesochoreum* and its tetraploid congener *E. albidum* (Liliaceae). *Evolution*.
- SABARA, H. A., P. KRON, AND B. C. HUSBAND. 2013. Cytotype coexistence leads to triploid hybrid production in a diploid-tetraploid contact zone of *Chamerion angustifolium* (Onagraceae). *American Journal of Botany* 100: 962-970.
- SANDERSON, M. J., D. COPETTI, A. BÚRQUEZ ET AL. 2015. Exceptional reduction of the plastid genome of saguaro cactus (*Carnegiea gigantea*): Loss of the *ndh* gene suite and inverted repeat. *American Journal of Botany* 102: 1-13.
- SASKI, C. S-B. LEE, H. DANIELL ET AL. 2005. Complete chloroplast genome sequence of *Glycine max* and comparative analyses with other legume genomes. *Plant Molecular Biology* 59: 309-322.
- SCHATLOWSKI, N., AND C. KÖHLER. 2012. Tearing down barriers: understanding the molecular mechanisms of interploidy hybridizations. *Journal of Experimental Botany* 63: 6059-6067.
- SCOTT, R. J., J. L. TRATT, AND A. BOLBOL. 2013. Seed development in interploidy hybrids. *Polyloid and Hybrid Genomics*: 271-290.
- SCOTT, R. J., M. SPIELMAN, J. BAILEY, AND H. G. DICKINSON. 1998. Parent-of-origin effects on seed development in *Arabidopsis thaliana*. *Development* 125: 3329-3341.
- SEKINE, D., T. OHNISHI, H. FURUUMI, A. ONO, T. YAMADA, N. KURATA, AND T. KINOSHITA. 2013. Dissection of two major components of the post-zygotic hybridization barrier in rice endosperm. *The Plant Journal* 76: 792-799.
- SILVERSIDE, A. J. 1990. A new binomial in *Mimulus*. *Watsonia* 18: 210-212.
- , 1998. *Mimulus* Section *Simiolus*. In T. Rich AND A. Jermy [eds.], *Plant Crib*, 259-261. Botanical Society of the British Isles, London.
- SMITH, D. R. 2015. The past, present and future of mitochondrial genomics: have we sequenced enough mtDNAs? *Briefings in Functional Genomics*: 10.1093/bfpg/elv027.
- SOLTIS, D. E., M. C. SEGOVIA- SALCEDO, I. JORDON-THADEN, L. MAJURE, N. M. MILES, E. V. MAVRODIEV, W. MEI, et al. 2014. Are polyploids really evolutionary dead-ends (again)? A critical reappraisal of Mayrose et al. (2011). *New Phytologist* 202: 1105-1117.
- STACE, C.A. 2010. *New flora of the British Isles*. Cambridge University Press.

# Asymmetric hybridization during allopolyploid speciation

- 918 STACE, C. A., C. D. PRESTON, AND D.A. PEARMAN. 2015. *Hybrid Flora of the British Isles*.  
919 BSBI Publications.
- 920 STAMATAKIS, A. 2006. RAXML-VI-HPC: maximum likelihood-based phylogenetic analyses with  
921 thousands of taxa and mixed models. *Bioinformatics* 22: 2688-2690.
- 922 STEBBINS, G. L. 1957. Self fertilization and population variability in higher plants. *American*  
923 *Naturalist* 91: 337-354.
- 924 STEELE, P. R., K. L. HERTWECK, D. MAYFIELD, M. R. MCKAIN, J. LEEBENS-MACK, AND J. C.  
925 PIRES. 2012. Quality and quantity of data recovered from massively parallel sequencing:  
926 examples in Asparagales and Poaceae. *American Journal of Botany* 99: 330-348.
- 927 STOUTE, A. I., V. VARENKO, G. J. KING, R. J. SCOTT, AND S. KURUP. 2012. Parental genome  
928 imbalance in *Brassica oleracea* causes asymmetric triploid block. *The Plant Journal* 71:  
929 503-516.
- 930 STRAUB, S. C., M. PARKS, K. WEITEMIER, M. FISHBEIN, R. C. CRONN, AND A. LISTON. 2012.  
931 Navigating the tip of the genomic iceberg: Next-generation sequencing for plant  
932 systematics. *American Journal of Botany* 99: 349-364.
- 933 TIFFIN, P., S. OLSON, AND L. C. MOYLE. 2001. Asymmetrical crossing barriers in angiosperms.  
934 *Proceedings of the Royal Society of London B: Biological Sciences* 268: 861-867.
- 935 TOONEN, R. J., AND S. HUGHES. 2001. Increased throughput for fragment analysis on an ABI  
936 Prism® 377 automated sequencer using a membrane comb and STRand software.  
937 *BioTechniques* 31: 1320-1325.
- 938 TWYFORD, A., AND R. ENNOS. 2012. Next-generation hybridization and introgression. *Heredity*  
939 108: 179-189.
- 940 TWYFORD, A. D., M. A. STREISFELD, D. B. LOWRY, AND J. FRIEDMAN. 2015. Genomic studies  
941 on the nature of species: adaptation and speciation in *Mimulus*. *Molecular Ecology* 24:  
942 2601-2609.
- 943 UNTERGASSER, A., I. CUTCUTACHE, T. KORESSAAR, J. YE, B. C. FAIRCLOTH, M. REMM, AND S.  
944 G. ROZEN. 2012. Primer3—new capabilities and interfaces. *Nucleic Acids Research* 40:  
945 e115.
- 946 VALLEJO-MARÍN, M. 2012. *Mimulus peregrinus* (Phrymaceae): A new British allopolyploid  
947 species. *Phytokeys* 14: 1-14.
- 948 VALLEJO-MARÍN, M., AND G. C. LYE. 2013. Hybridisation and genetic diversity in introduced  
949 *Mimulus* (Phrymaceae). *Heredity* 110: 111-122.
- 950 VALLEJO-MARÍN, M., R. J. BUGGS, A. M. COOLEY, AND J. R. PUZEY. 2015. Speciation by  
951 genome duplication: Repeated origins and genomic composition of the recently formed  
952 allopolyploid species *Mimulus peregrinus*. *Evolution* 69: 1487-1500.
- 953 VAN LAERE, K., D. HERMANS, L. LEUS, AND J. VAN HUYLENBROECK. 2015. Interspecific  
954 hybridisation within *Buxus* spp. *Scientia Horticulturae* 185: 139-144.
- 955 VON BOHLEN, C. 1995. El género *Mimulus* L. (Scrophulariaceae) en Chile. *Gayana Botanica* 52:  
956 7-28.
- 957 WASHBURN, J. D., J. C. SCHNABLE, G. DAVIDSE, AND J. C. PIRES. 2015. Phylogeny and  
958 photosynthesis of the grass tribe Paniceae. *American Journal of Botany* 102: 1493-1505.
- 959 WATKINS, A. 1932. Hybrid sterility and incompatibility. *Journal of Genetics* 25: 125-162.
- 960 WATSON, J. M. 1989. 'Andean Nymph,' a pink *Mimulus*. Thompson & Morgan, Ipswich.
- 961 WEITEMIER, K., S. C. STRAUB, R. C. CRONN, M. FISHBEIN, R. SCHMICKL, A. McDONNELL, AND  
962 A. LISTON. 2014. Hyb-Seq: Combining target enrichment and genome skimming for  
963 plant phylogenomics. *Applications in Plant Sciences* 2.
- 964 WU, C. A., D. B. LOWRY, A. M. COOLEY, K. M. WRIGHT, Y.-W. LEE, AND J. H. WILLIS. 2008.  
965 *Mimulus* is an emerging model system for the integration of ecological and genomic  
966 studies. *Heredity* 101: 220-230.



# Asymmetric hybridization during allopolyploid speciation

- 967 WYMAN, S. K., R. K. JANSEN, AND J. L. BOORE. 2004. Automatic annotation of organellar  
968 genomes with DOGMA. *Bioinformatics* 20: 3252-3255.
- 969 YUAN, Y.-W., J. M. SAGAWA, R. C. YOUNG, B. J. CHRISTENSEN, AND H. D. BRADSHAW. 2013.  
970 Genetic dissection of a major anthocyanin QTL contributing to pollinator-mediated  
971 reproductive isolation between sister species of *Mimulus*. *Genetics* 194: 255-263.
- 972 ZHANG, H, C. LI, H. MIAO, AND S. XIONG. 2013. Insights form the complete chloroplast genome  
973 in the evolution of *Sesamum indicum* L. *PloS ONE* 8: e80508.
- 974

# Asymmetric hybridization during allopolyploid speciation

## FIGURE LEGENDS

**Figure 1. (A)** Mean seed number and 95% confidence intervals (CI) obtained in crosses within species (MG x MG, and ML x ML), and between species (MG x ML and ML x MG). Sample sizes: 9, 11, 10, 10 fruits. Different letters indicate significantly different means as assessed with a pairwise Tukey test ( $z > 2.98$ ,  $P < 0.05$ ). **(B)** Mean germination of *M. guttatus* x *M. guttatus* (black circle), *M. luteus* x *M. luteus* (black square), *M. guttatus* x *M. luteus* (gray circle), *M. luteus* x *M. guttatus* (gray square). Crosses are indicated as maternal x paternal parent. Four lines for each cross type were analyzed, planting 100 seeds per line (1600 seeds total). Each data point represents the average (+/- SE) proportion of germinated seeds across the four lines for a given cross type across the germination period.

**Figure 2.** Plant height at first flower **(A)**, and nectar content per flower **(B)** of *Mimulus* crosses within- (MG x MG and ML x ML) and between-species (MG x ML and ML x MG). Sample size (number of individuals) for plant height:  $n = 72, 54, 11, 78$ ; sample size (number of flowers):  $n = 67, 73, 14, 73$ . Dotted line shows the mid-parent value. Bars are 95% confidence intervals.

**Figure 3.** Circular plot of *Mimulus luteus* var. *luteus* chloroplast genome. The plastome is 153,150 base pairs with a 84,293 base pair large single copy (LSC) region, a 17,851 base pair small single copy (SSC) region, and two 25,503 base pair inverted repeat regions (IRB and IRA). Photosystem genes are in green, RNA polymerase subunits are in orange, ribosomal genes are in black, other protein encoding genes are in yellow, rRNAs are in blue, and tRNAs are in black.

**Figure 4.** Maximum likelihood tree of *Mimulus* species and populations based on alignments of 86,843 base pairs from chloroplast genomes (A) and 402,717 base pairs from mitochondrial genomes (B). Bootstrap values are indicated. Nodes with less than 50% bootstrap support were collapsed. Samples genotyped using sequence-capture ( $N=16$ ) are excluded from the mitochondrial analysis due to low genotyping success. Trees are rooted with *M. dentilobus*. Color-coding is based on species identity.

**Figure 5.** Matrilineal haplotype network (statistical parsimony; TCS) of (A) chloroplast and (B) mitochondrial SNPs. The chloroplast analysis is based on 493 sites, and the mitochondrial on 784 sites. Sites with more than 5% missing data were excluded. Hash marks on lines are mutational steps. The haplotype circles are labeled with one individual and all other individuals with that

## Asymmetric hybridization during allopolyploid speciation

haplotype are listed to the right. The mitochondrial dataset excludes 16 samples obtain through sequence capture due to low genotyping success (see Results). Names for individual samples are only shown here for *M. x robertsii* and *M. peregrinus*.

**Figure 6.** Principal component analysis of (A) 929 SNPs from the chloroplast and (B) 1454 SNPs from the mitochondria. Only sites successfully genotyped in 41/45 samples were included in this analysis. The chloroplast dataset excludes one individual (CG) with low genotyping success for the analyzed SNPs. The mitochondrial dataset excludes 16 samples obtain through sequence capture due to low genotyping success (see Results). A fully annotated version of this Figure is available as Appendix S8 and Appendix S9.

# Asymmetric hybridization during allopolyploid speciation

**Table 1.** Recent (1998-2015) reports of asymmetric crossing success following interploidy crosses. Some of the studies listed below verified that the seeds or seedlings produced were triploid; others did not and could potentially include diploid, tetraploid, or aneuploid offspring in their measure of success.

| Genus                            | Reference                           | Ploidy Type | Superior Direction | Measure of Success                                                                        |
|----------------------------------|-------------------------------------|-------------|--------------------|-------------------------------------------------------------------------------------------|
| <i>Brassica</i>                  | Stout et al., 2012                  | auto (a)    | m                  | % seed germination; all seedlings tested were triploid                                    |
| <i>Brassica</i> x <i>Sinapis</i> | Cheung et al., 2015                 | allo        | m                  | triploid seedlings per pollination, relative to intraploidy crosses                       |
| <i>Buxus</i>                     | Van Laere et al., 2015              | unknown     | m                  | seedlings per pollination                                                                 |
| <i>Calluna</i>                   | Behrend et al., 2015                | auto (n)    | m                  | triploid seedlings per pollination                                                        |
| <i>Erythronium</i>               | Roccatorte, Russo, and Pilson, 2015 | auto (n)    | m                  | seeds per pollination relative to intraploidy crosses                                     |
| <i>Lonicera</i>                  | Miyashita and Hoshino, 2015         | unknown     | m*                 | triploid seedlings per pollination                                                        |
| <i>Oryza</i> (rice)              | Sekine et al., 2013                 | auto (n)    | m                  | % seed germination                                                                        |
| <i>Acacia</i>                    | Nghiem et al., 2013                 | auto (c)    | p                  | filled fruits per pollination and filled seeds per fruit, relative to intraploidy crosses |

Asymmetric hybridization during allopolyploid speciation

|                     |                                 |                                            |    |                                                                                                                |
|---------------------|---------------------------------|--------------------------------------------|----|----------------------------------------------------------------------------------------------------------------|
| <i>Aster</i>        | Castro et al., 2011             | autohexaploid (n)                          | p  | seeds per pollination, % seed germination, triploid seedlings per pollination, relative to intraploidy crosses |
| <i>Castilleja</i>   | Hersch-Green, 2012              | unknown naturally occurring 2x, 4x, and 8x | p  | filled fruits per pollination and seeds per fruit, relative to intraploidy crosses                             |
| <i>Chamerion</i>    | Sabara, Kron, and Husband, 2013 | unknown naturally occurring 2x and 4x      | p  | observed vs expected triploid production from wild-collected maternal seed production                          |
| <i>Leucanthemum</i> | Greiner and Oberprieler, 2012   | allo                                       | p  | seeds per pollination relative to intraploidy crosses                                                          |
| <i>Solanum</i>      | Dinu et al., 2005               | auto (u)                                   | p* | seed development and % seed germination                                                                        |

*Notes: Ploidy type: a, derived from anther culture; c, colchicine-induced; n, naturally-occurring; u, type of autotetraploid unknown. Superior*

*Direction: m, crosses more successful when maternal parent has higher ploidy; p, crosses more successful when paternal parent has higher ploidy.*

*\*with embryo rescue*

# Asymmetric hybridization during allopolyploid speciation

**Table 2.** Sample names and sampling locations for *Minulus* accessions used in this study. Data type: WGS = whole-genome sequencing; SC = sequence capture.

| Taxon                   | Population | Sample ID   | Short Name | Location                                     | Latitude | Longitude | Data Type* | Accession Number |
|-------------------------|------------|-------------|------------|----------------------------------------------|----------|-----------|------------|------------------|
| <i>M. guttatus</i> (2x) | AYR        | 10-AYR-10   | AYR1       | Ayr, Ayrshire, Scotland                      | 55.461   | -4.625    | WGS        | SRR1462346       |
|                         | AYR        | 10-AYR-18-1 | AYR2       | Ayr, Ayrshire, Scotland                      | 55.461   | -4.625    | SC         | dryad.gg273      |
|                         | CER        | 10-CER-10   | CER1       | Cerrigydrudion, Wales                        | 53.006   | -3.549    | WGS        | SRR1475232       |
|                         | CER        | 10-CER-25-1 | CER2       | Cerrigydrudion, Wales                        | 53.006   | -3.549    | SC         | dryad.gg273      |
|                         | CRO        | 12-CRO-5    | CRO        | Crowan, Cornwall                             | 50.163   | -5.293    | WGS        | SRR1482405       |
|                         | DBL        | 10-DBL-20   | DBL1       | Dunblane, Scotland                           | 56.197   | -3.965    | WGS        | SRR1475385       |
|                         | DBL        | CG-1-1-JP1  | CG         | Dunblane, Scotland                           | 56.197   | -3.965    | WGS        | this study       |
|                         | DBL        | 11-DBL-1-1  | DBL2       | Dunblane, Scotland                           | 56.187   | -3.965    | SC         | dryad.gg273      |
|                         | HOU        | 10-HOU-17   | HOU1       | Houghton Lodge, England                      | 51.097   | -1.508    | WGS        | SRR1481643       |
|                         | HOU        | 10-HOU-23-1 | HOU2       | Houghton Lodge, England                      | 51.097   | -1.508    | SC         | dryad.gg273      |
|                         | PAC        | 12-PAC-39   | PAC        | Packhorse Bridge, Scotland                   | 57.355   | -3.336    | WGS        | SRR1482406       |
|                         | QUA        | 10-QUA-47   | QUA        | Quarff, Shetland Islands                     | 60.105   | -1.227    | WGS        | SRR1481644       |
|                         | TOM        | 10-TOM-23   | TOM        | Tomintoul, Scotland                          | 57.255   | -3.368    | WGS        | SRR1482404       |
|                         | TRE        | 12-TRE-17   | TRE        | Trenar Coombe, England                       | 50.498   | -4.465    | WGS        | SRR1482409       |
|                         | TSG        | TSG         | TSG        | Haida Gwaii, Canada                          | 53.419   | -131.916  | WGS        | SRS120816        |
|                         | VIC        | 12-VIC-18   | VIC        | Victoria Bridge, Northern Ireland            | 54.763   | -7.454    | WGS        | SRR1482407       |
|                         | AHQ        | AHQ1        | AHQ1       | Lonestar Basin Thermal Spring, Teton Co., WY | 44.431   | -110.813  | WGS        | SRR486613        |
|                         | BOG        | BOG         | BOG        | Bog Hot Springs, Humboldt Co., NV            | 41.924   | -118.804  | WGS        | SRR071996        |
|                         | LMC        | LMC         | LMC        | Yorkville, Mendocino Co., CA                 | 38.864   | -123.084  | WGS        | SRR072031        |
|                         | MAR        | MAR         | MAR        | Marshanne Landing, Douglas Co., OR           | 43.479   | -123.294  | WGS        | SRR071967        |
|                         | PED        | PED         | PED        | San Pedro River, Pinal Co., AZ               | 32.711   | -110.628  | WGS        | SRR071969        |
|                         | REM        | REM         | REM        | Runsey, Yolo Co., CA                         | 38.859   | -122.410  | WGS        | SRR071971        |
|                         | SWB        | SWB         | SWB        | Spern Whale Beach, Mendocino Co., CA         | 39.036   | -123.691  | WGS        | SRR072030        |

# Asymmetric hybridization during allopolyploid speciation

|                                      |                   |                   |      |                                        |        |          |     |             |
|--------------------------------------|-------------------|-------------------|------|----------------------------------------|--------|----------|-----|-------------|
| <i>M. guttatus</i>                   | YJS               | YJS               | YJS  | Yellowjacket creek, Lemhi Co., ID      | 44,951 | -114,585 | WGS | SRR071970   |
| <i>M. guttatus</i><br><i>complex</i> |                   |                   |      |                                        |        |          |     |             |
| <i>M. platynealys</i>                | CVP               | CVP               | CVP  | Coleman Valley Road, Sonoma Co., CA    | 38,372 | -123,055 | WGS | SRR486607   |
| <i>M. micranthus</i>                 | EBR               | EBR               | EBR  | Branscomb, Mendocino Co., CA           | 39,631 | -123,532 | WGS | SRR486609   |
| <i>M. nasutus</i>                    | SF                | SF                | SF   | Sherans Falls, Wasco Co., OR           | 45,635 | -120,914 | WGS | SRR400478   |
| <i>M. luteus</i> s.l.<br>(4x)        | COL               | CS-4-JP1          | CS   | Coldstream, Scotland                   | 55,655 | -2,240   | WGS | this study  |
|                                      | COL               | 10-COL-20e-1      | COL  | Coldstream, Scotland                   | 55,655 | -2,240   | SC  | dryad.gg273 |
|                                      | EVI               | 13-EVI-5          | EVI  | Evie, Scotland                         | 59,112 | -3,108   | SC  | dryad.gg273 |
| <i>M. l. luteus</i>                  | EY                | MLJ-EY            | MLJ1 | El Yeso, Chile                         | -33.4  | -70.0    | WGS | this study  |
| <i>M. l. luteus</i>                  | EY                | MLJ-EY-7x4-1-3    | MLJ2 | El Yeso, Chile                         | -33.4  | -70.0    | SC  | dryad.gg273 |
| <i>M. l. variegatus</i>              | RC                | MLV-RC-5x4-4-1    | MLV  | Rio Cipreses, Chile                    | -34.2  | -70.3    | SC  | dryad.gg273 |
| <i>M. robertsii</i><br>(3x)          | DBL x COL<br>(3x) | H003b-JP1         | HOO  | Artificial triploid (CG-1-1 x CS-4-3)  | 58,337 | -6,202   | WGS | this study  |
|                                      | GIO               | 13-GIO-13         | GIO  | Giordail Beach, Scotland               | 55,424 | -3,735   | SC  | dryad.gg273 |
|                                      | LED               | 12-LED-3-1        | LED1 | Leadhills, Scotland                    | 54,806 | -2,376   | SC  | dryad.gg273 |
|                                      | NEN               | 12-NEN-41         | NEN  | Nenthall, England                      | 58,996 | -3,183   | SC  | dryad.gg273 |
|                                      | TOR               | 13-TOR-13         | TOR  | Tomnission, Scotland                   |        |          |     |             |
| <i>M. peregrinus</i><br>(6x)         | DBL x COL<br>(6x) | 13-SYN-1-JP1      | SYN  | Artificial hexaploid (CG-1-1 x CS-4-3) | 55,467 | 3,738    | WGS | this study  |
|                                      | GON               | 12-GON-106        | GON  | Glen Gonnar, Scotland                  | 55,423 | -3,735   | WGS | this study  |
|                                      | LED               | 11-LED-seed-1-JP1 | LED2 | Leadhills, Scotland                    | 55,423 | -3,735   | SC  | dryad.gg273 |
|                                      | LED               | 11-LED-seed-30    | LED3 | Leadhills, Scotland                    | 55,424 | -3,735   | SC  | dryad.gg273 |
|                                      | LED               | 11-LED-seed-2-11  | LED4 | Leadhills, Scotland                    | 58,969 | -3,283   | SC  | dryad.gg273 |
|                                      | STR               | 13-STR-32         | STR  | Stromness, Scotland                    |        |          |     |             |
| <i>M. dentilobus</i><br>(outgroup)   | DENT              | DENT              | DENT | NA                                     | NA     | NA       | WGS | SRX030541   |

Note: \*Data type: WGS, Whole Genome Sequencing; SC, Sequence Capture.



Asymmetric hybridization during allopolyploid speciation

**Table 3.** Mitochondrial haplotypes of 163 individuals of *M. guttatus*, *M. luteus*, and their hybrid derivatives, the triploid *M. x robertsii* and allopolyploid *M. peregrinus*. Haplotypes are given as the size in base pairs of three mitochondrial loci with fragment-length polymorphism (indels). Between 1 and 15 individuals of each of 21 populations, and one artificially created allopolyploid, were genotyped at all three loci. The synthetic allopolyploid was the product of a *M. guttatus* (DBL) x *M. luteus s.l.* (COL) cross, with *M. guttatus* as the maternal parent. A single individual phenotyped as *M. guttatus* (DBL), but with a “*M. luteus*” maternal haplotype is presented separately.

| Taxon                            | Population | # Samples | Haplotype          | Inferred maternal parent |
|----------------------------------|------------|-----------|--------------------|--------------------------|
| <i>M. guttatus</i>               | COL        | 5         | 237/296/313        | <i>M. guttatus</i>       |
|                                  | DBL        | 5         | 237/296/313        | <i>M. guttatus</i>       |
|                                  | DBL        | 1         | <b>240/292/317</b> | <i>M. luteus</i>         |
|                                  | TOM        | 3         | 237/296/313        | <i>M. guttatus</i>       |
| <i>M. luteus s.l.</i>            | COL        | 5         | <b>240/292/317</b> | <i>M. luteus</i>         |
|                                  | EVI        | 3         | <b>240/292/317</b> | <i>M. luteus</i>         |
| <i>M. luteus var. luteus</i>     | EY, Chile  | 1         | <b>240/292/317</b> | <i>M. luteus</i>         |
|                                  | RC, Chile  | 1         | <b>240/292/317</b> | <i>M. luteus</i>         |
| <i>M. luteus var. variegatus</i> |            |           |                    |                          |
| <i>M. x robertsii</i>            | BCH        | 6         | 237/296/313        | <i>M. guttatus</i>       |
|                                  | FOR        | 9         | 237/296/313        | <i>M. guttatus</i>       |
|                                  | EVI        | 1         | 237/296/313        | <i>M. guttatus</i>       |
|                                  | GIO        | 8         | 237/296/313        | <i>M. guttatus</i>       |
|                                  | GON        | 9         | 237/296/313        | <i>M. guttatus</i>       |
|                                  | GOO        | 10        | 237/296/313        | <i>M. guttatus</i>       |
|                                  | GRO        | 10        | 237/296/313        | <i>M. guttatus</i>       |
|                                  | NEN        | 9         | 237/296/313        | <i>M. guttatus</i>       |
|                                  | NEN        | 3         | <b>240/292/317</b> | <i>M. luteus</i>         |
|                                  | NOR        | 9         | 237/296/313        | <i>M. guttatus</i>       |
|                                  | PLY        | 7         | 237/296/313        | <i>M. guttatus</i>       |
|                                  | SCA        | 9         | 237/296/313        | <i>M. guttatus</i>       |
|                                  | TAR        | 10        | 237/296/313        | <i>M. guttatus</i>       |
|                                  | TOR        | 10        | 237/296/313        | <i>M. guttatus</i>       |

Asymmetric hybridization during allopolyploid speciation

| <i>M. peregrinus</i> | LED                   | 15  | 237/296/313 | <i>M. guttatus</i> |
|----------------------|-----------------------|-----|-------------|--------------------|
|                      | STR                   | 8   | 237/296/313 | <i>M. guttatus</i> |
|                      | Synthetic (DBL x COL) | 6   | 237/296/313 | <i>M. guttatus</i> |
| Total                | 22                    | 163 |             |                    |

# Asymmetric hybridization during allopolyploid speciation

**Table 4.** Phenotypic measurements of *M. guttatus* (MG x MG), *M. luteus* (ML x ML), and their reciprocal hybrids (MG x ML, and ML x MG). Crosses are shown as maternal x paternal parent. Mean +/- standard error (SE). All values in millimeters.

|                          | <b>MG x MG</b><br>(n=146) | <b>MG x ML</b><br>(n=117) | <b>ML x MG</b><br>(n=23) | <b>ML x ML</b><br>(n=155) |
|--------------------------|---------------------------|---------------------------|--------------------------|---------------------------|
| <b>Floral traits</b>     |                           |                           |                          |                           |
| Corolla height           | 23.54 ± 0.47              | 26.85 ± 0.44              | 27.43 ± 1.47             | 21.18 ± 0.42              |
| Corolla width            | 27.26 ± 0.4               | 30.53 ± 0.39              | 29.79 ± 1.44             | 24.21 ± 0.46              |
| Corolla throat           | 2.56 ± 0.07               | 3.63 ± 0.07               | 3.98 ± 0.26              | 4.43 ± 0.08               |
| Corolla tube             | 20.74 ± 0.22              | 24.38 ± 0.24              | 24.45 ± 0.5              | 23.51 ± 0.27              |
| Flower depth             | 36.04 ± 0.47              | 36.54 ± 0.38              | 35.34 ± 1.15             | 31.53 ± 0.4               |
| Calyx length             | 13.12 ± 0.14              | 14.81 ± 0.15              | 15.03 ± 0.32             | 13.87 ± 0.12              |
| Pedicle length           | 18.91 ± 0.45              | 42.16 ± 1.31              | 35.31 ± 3.12             | 46.53 ± 1.01              |
| <b>Vegetative traits</b> |                           |                           |                          |                           |
| Bract length             | 16.58 ± 0.48              | 56.59 ± 2.34              | 43.42 ± 5.93             | 52.62 ± 1.78              |
| Bract width              | 16.21 ± 0.39              | 42.95 ± 1.46              | 31.2 ± 2.86              | 34.62 ± 0.93              |

Asymmetric hybridization during allopolyploid speciation

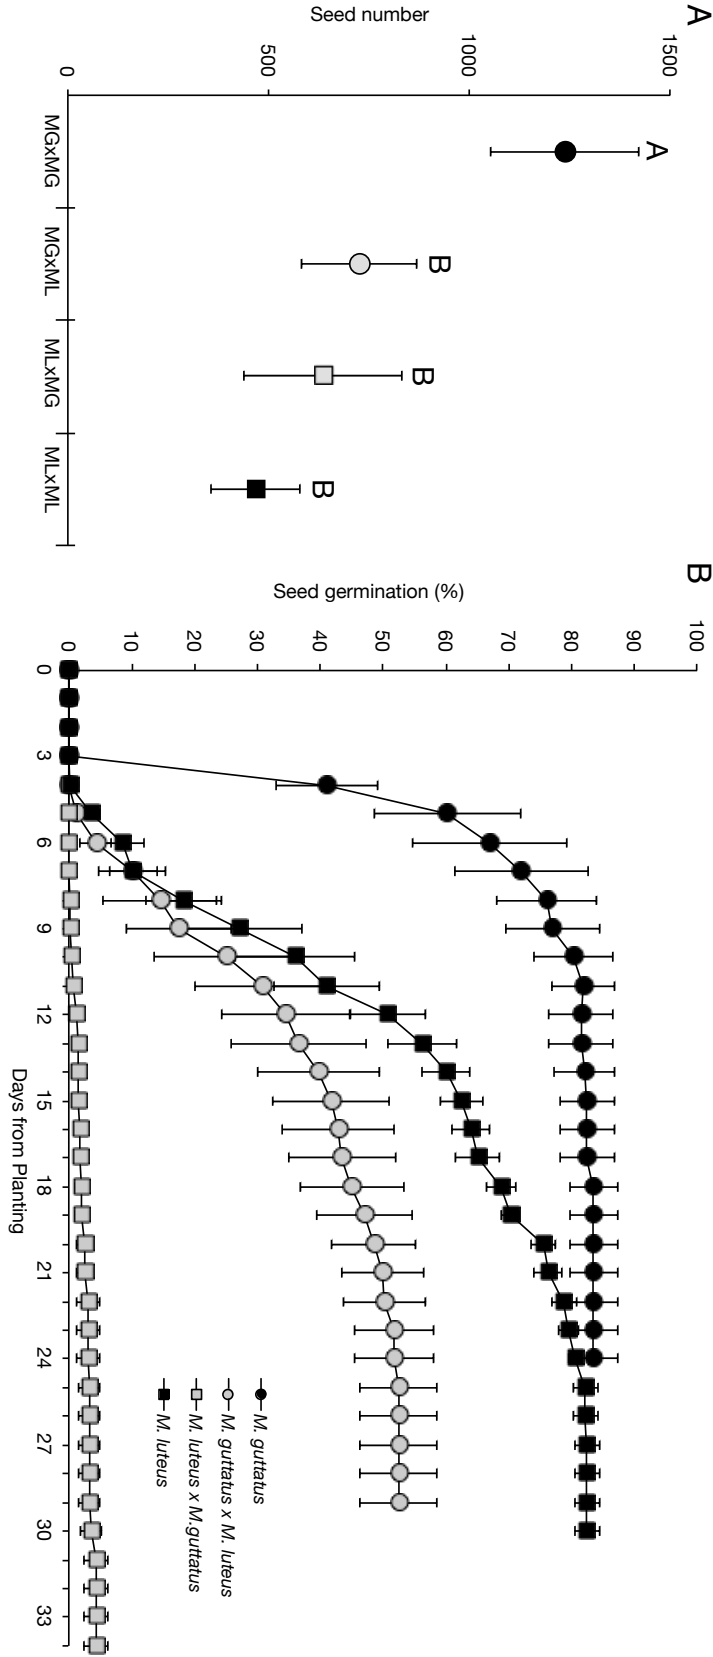

Figure 1.

# Asymmetric hybridization during allopolyploid speciation

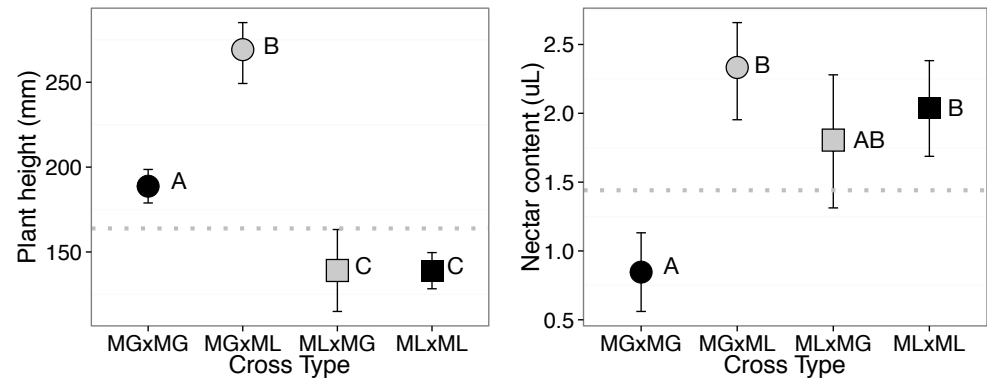

**Figure 2.**



# Asymmetric hybridization during allopolyploid speciation

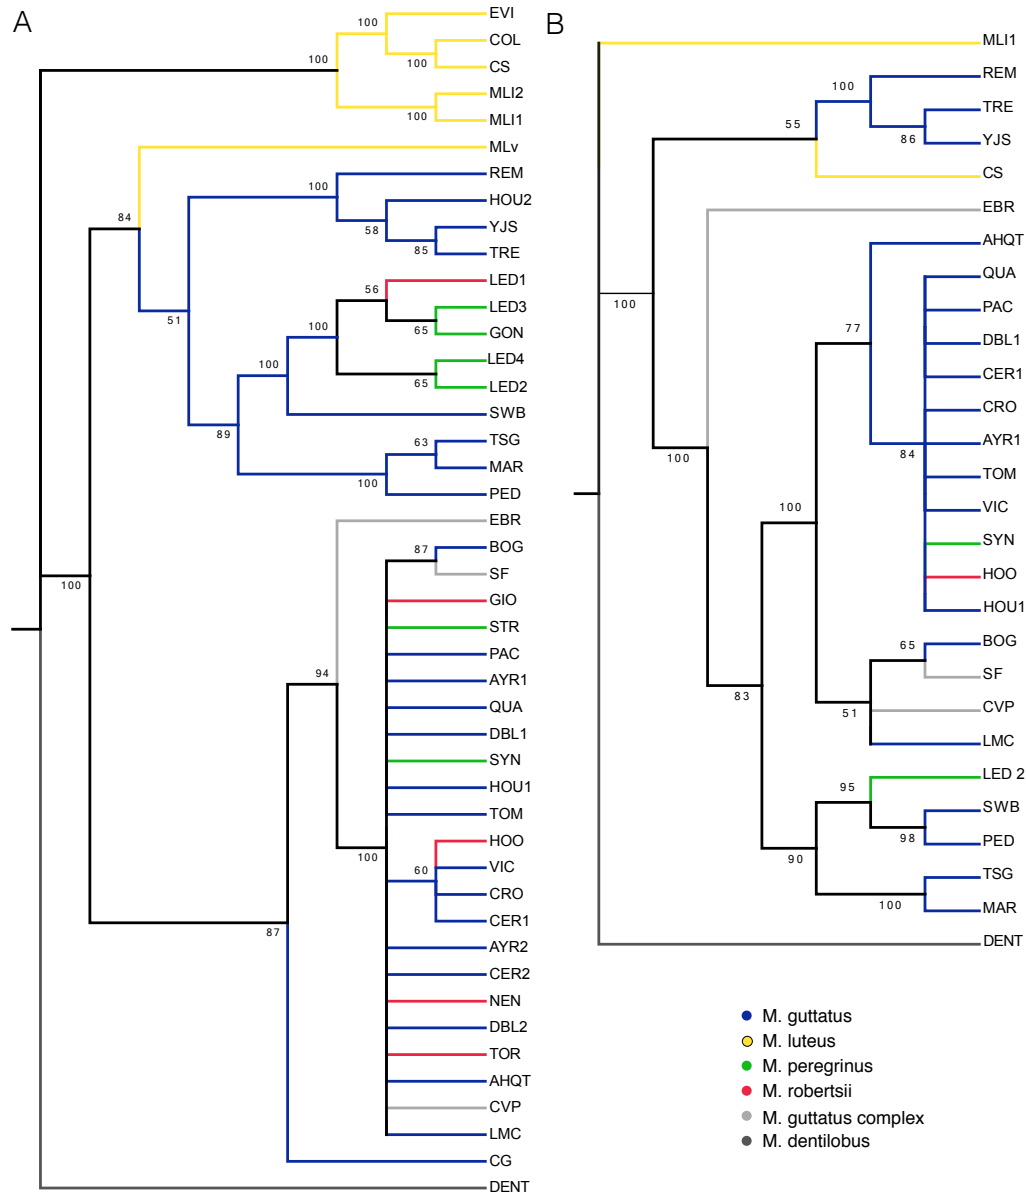

**Figure 4.**



# Asymmetric hybridization during allopolyploid speciation

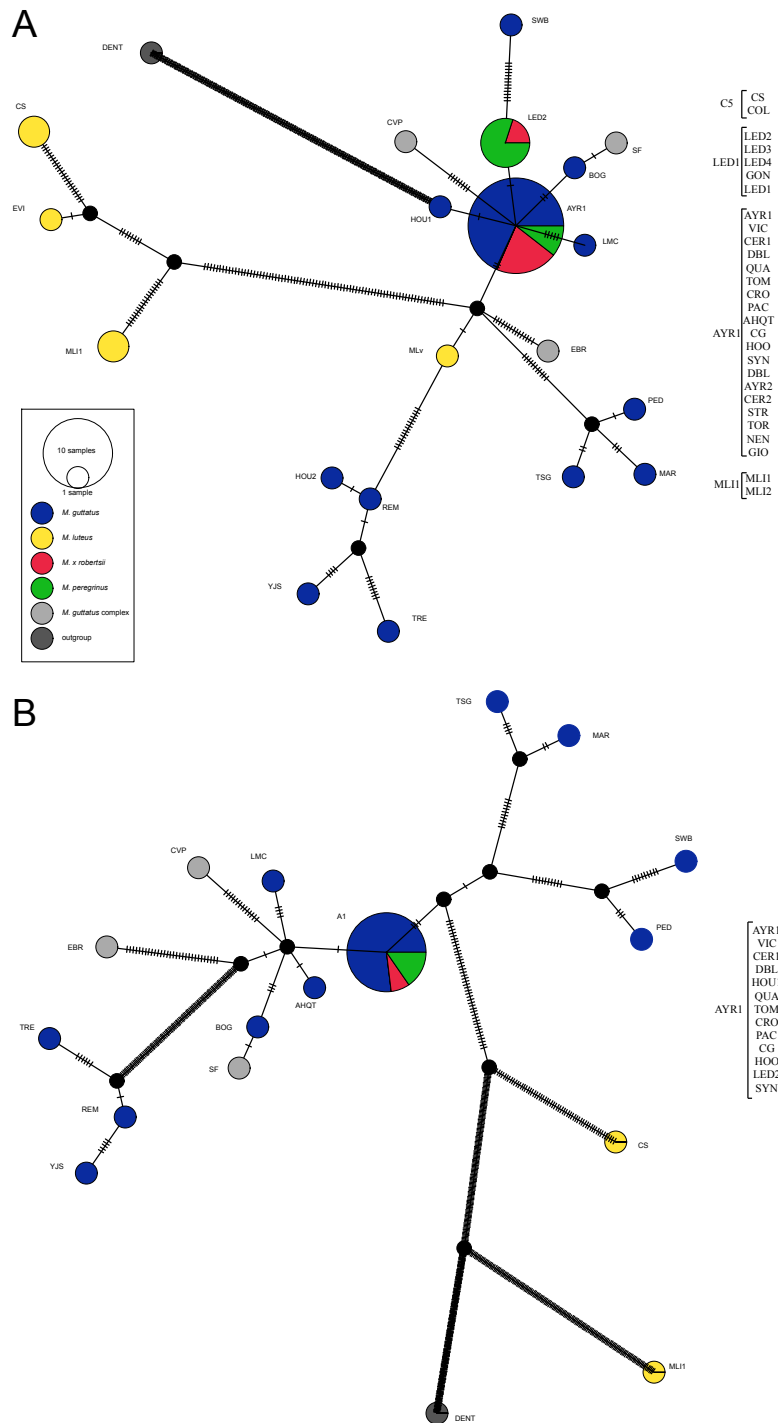

**Figure 5.**

# Asymmetric hybridization during allopolyploid speciation

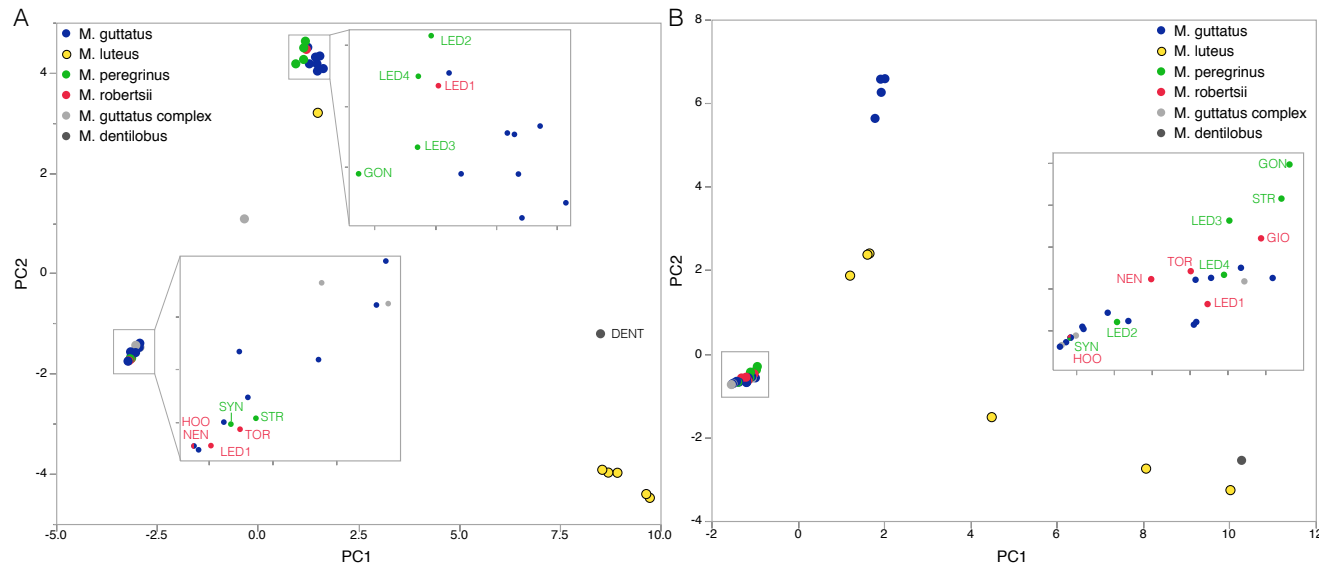

**Figure 6**
